# Supplementary material for: Body muscle gain and markers of cardiovascular disease susceptibility in young adulthood: A cohort study
Source: PubMed Central journal article supplement (PMC8428664; doi:10.1371/journal.pmed.1003751), 2021-09-09

**S1 Fig** Sex-specific distributions of lean and fat mass indices (kg/m<sup>2</sup>) at age 10y

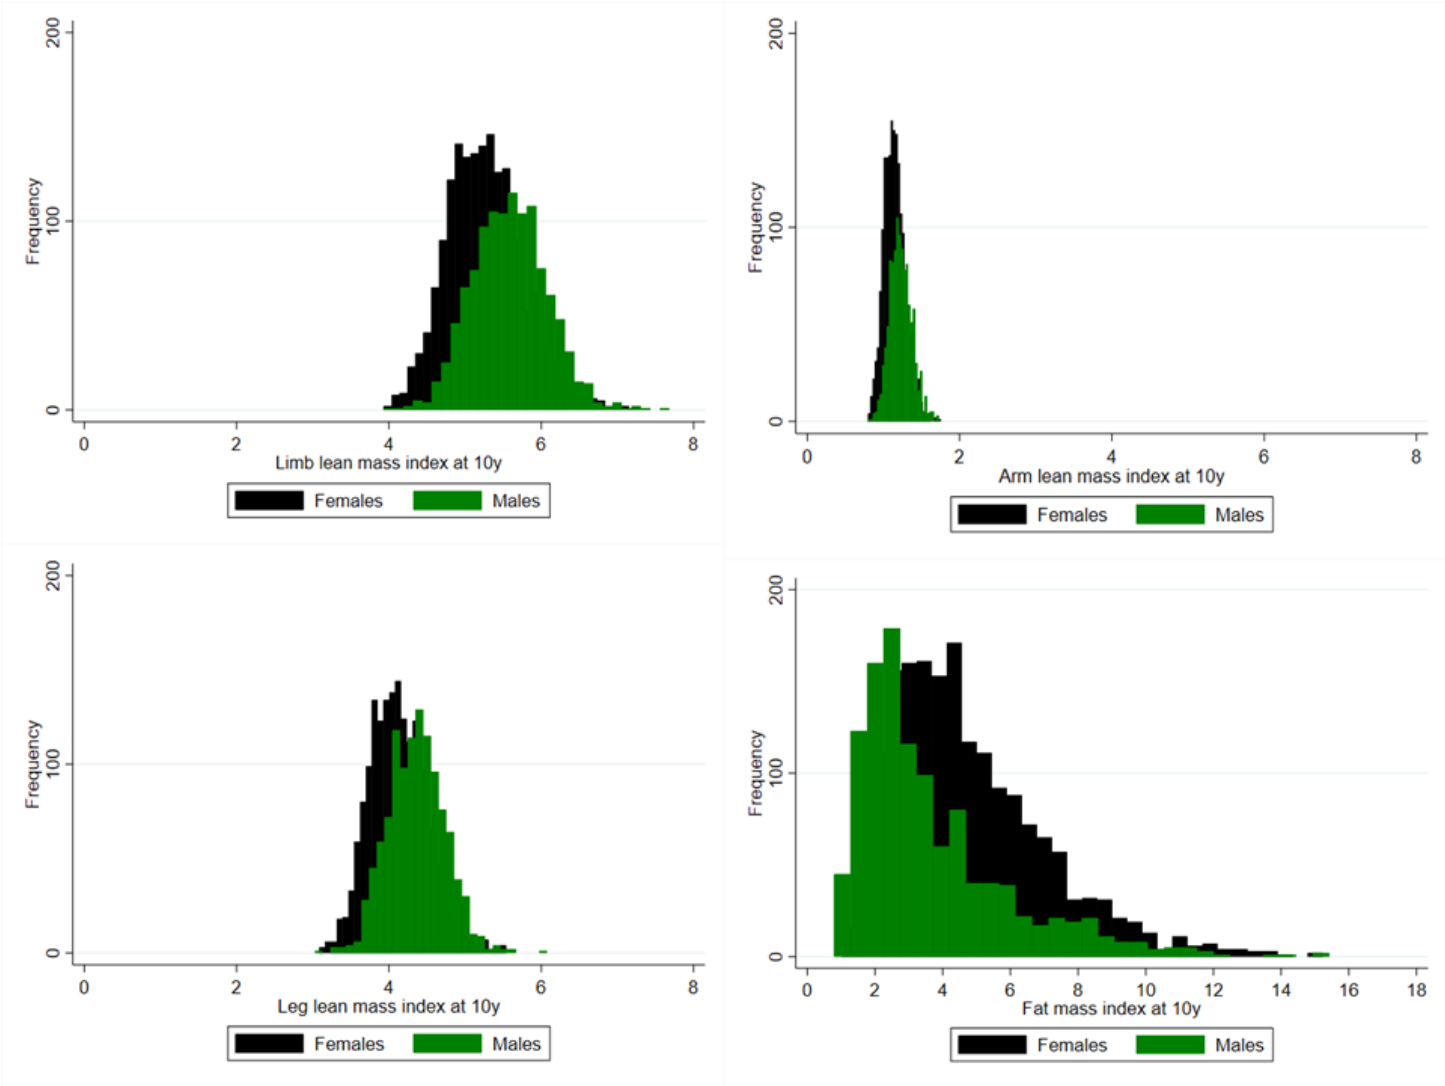

Supplement: pmed.1003751.s002.pdf [file pmed.1003751.s002.pdf]
