# Supplementary material for: Body muscle gain and markers of cardiovascular disease susceptibility in young adulthood: A cohort study
Source: PubMed Central journal article supplement (PMC8428664; doi:10.1371/journal.pmed.1003751), 2021-09-09
Supplement: pmed.1003751.s006.pdf [file pmed.1003751.s006.pdf]

**S5 Fig** Sex-specific distributions of maximum and relative grip strength in childhood and young adulthood

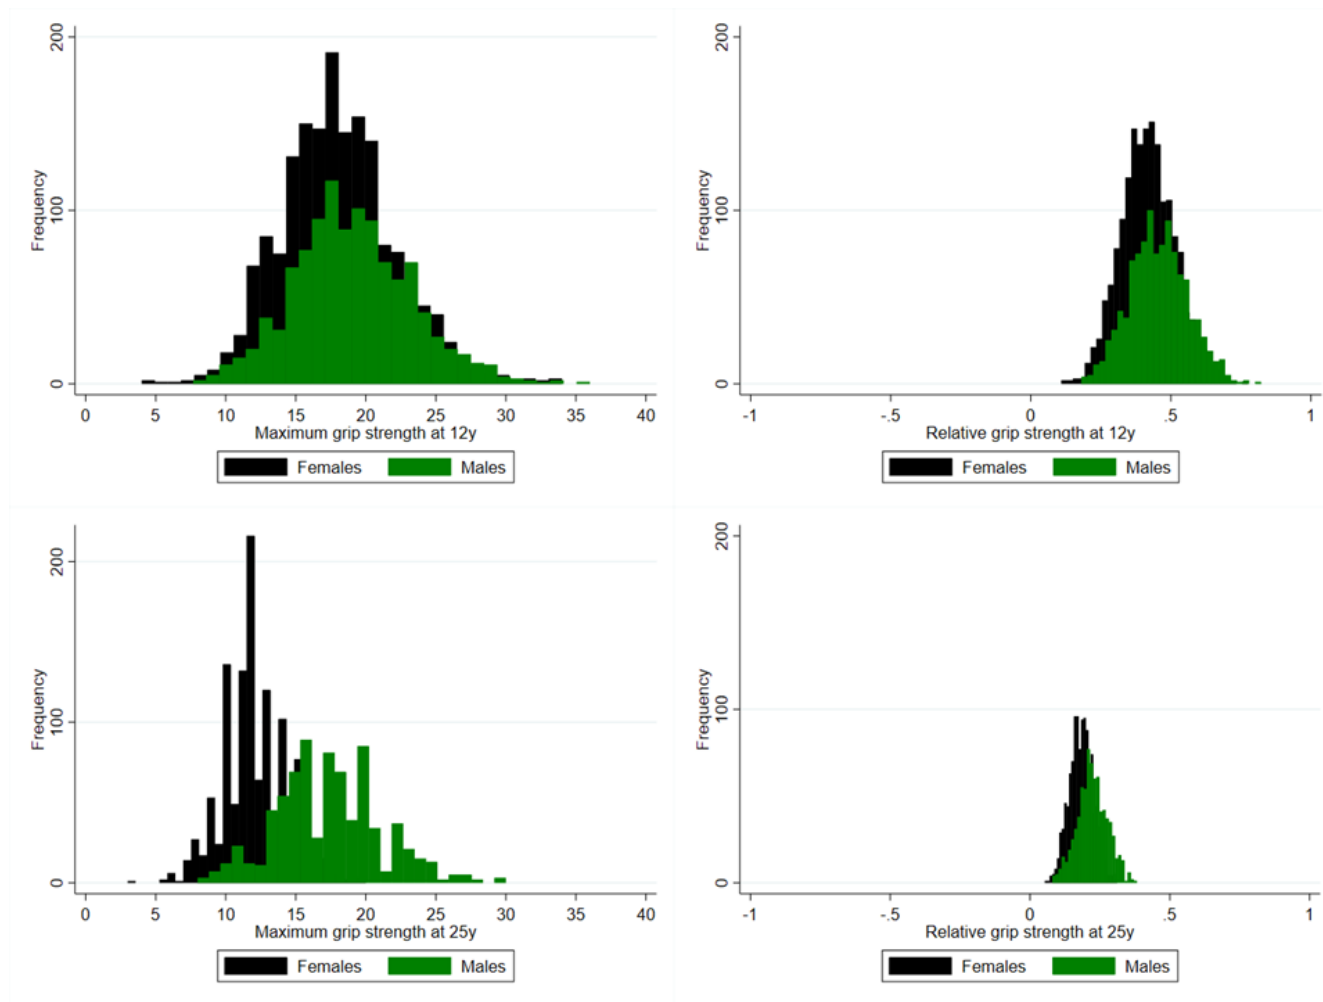

Units of maximum grip are kg at age 12y and lb/in<sup>2</sup> at age 25y. Units of relative grip are kg / weight in kg at age 12y and lb/in<sup>2</sup> / weight in kg at age 25y.
