# Supplementary material for: Body muscle gain and markers of cardiovascular disease susceptibility in young adulthood: A cohort study
Source: PubMed Central journal article supplement (PMC8428664; doi:10.1371/journal.pmed.1003751), 2021-09-09
Supplement: pmed.1003751.s007.pdf [file pmed.1003751.s007.pdf]

**S6 Fig** Sex-specific changes in lean and fat mass indices from childhood to young adulthood

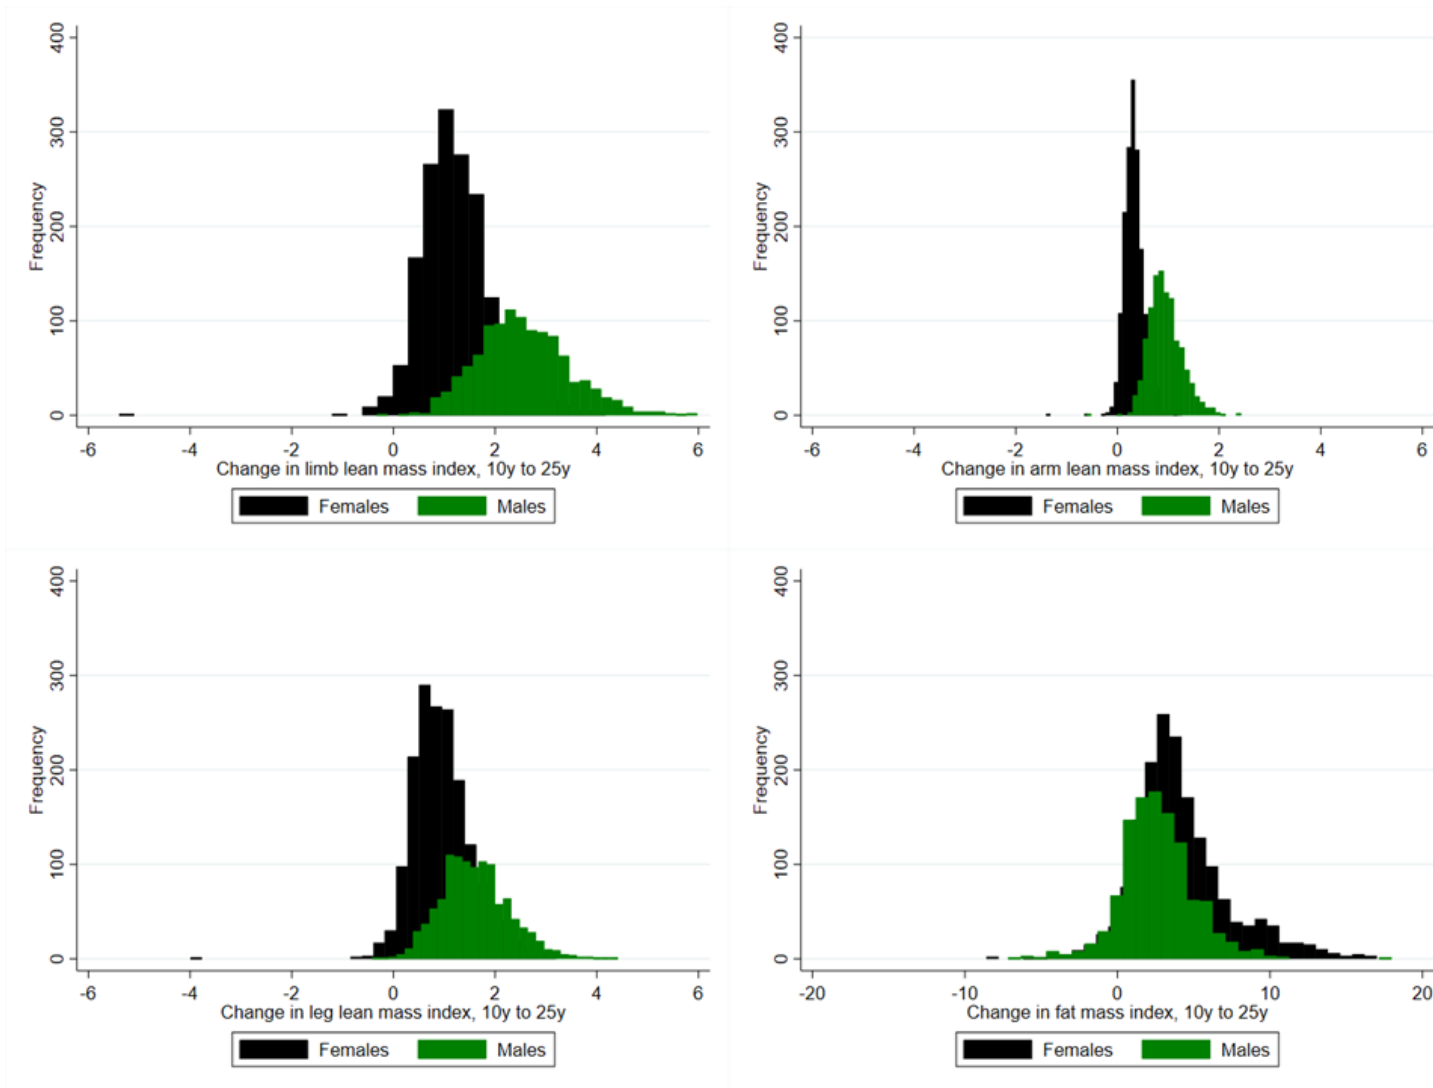

Change values are based on difference scores (25y value minus 10y value), in original units ( $\text{kg}/\text{m}^2$ ).
