# Supplementary material for: Body muscle gain and markers of cardiovascular disease susceptibility in young adulthood: A cohort study
Source: PubMed Central journal article supplement (PMC8428664; doi:10.1371/journal.pmed.1003751), 2021-09-09
Supplement: pmed.1003751.s009.pdf [file pmed.1003751.s009.pdf]

**S8 Fig** Sex-specific changes in lean and fat mass indices in adolescence

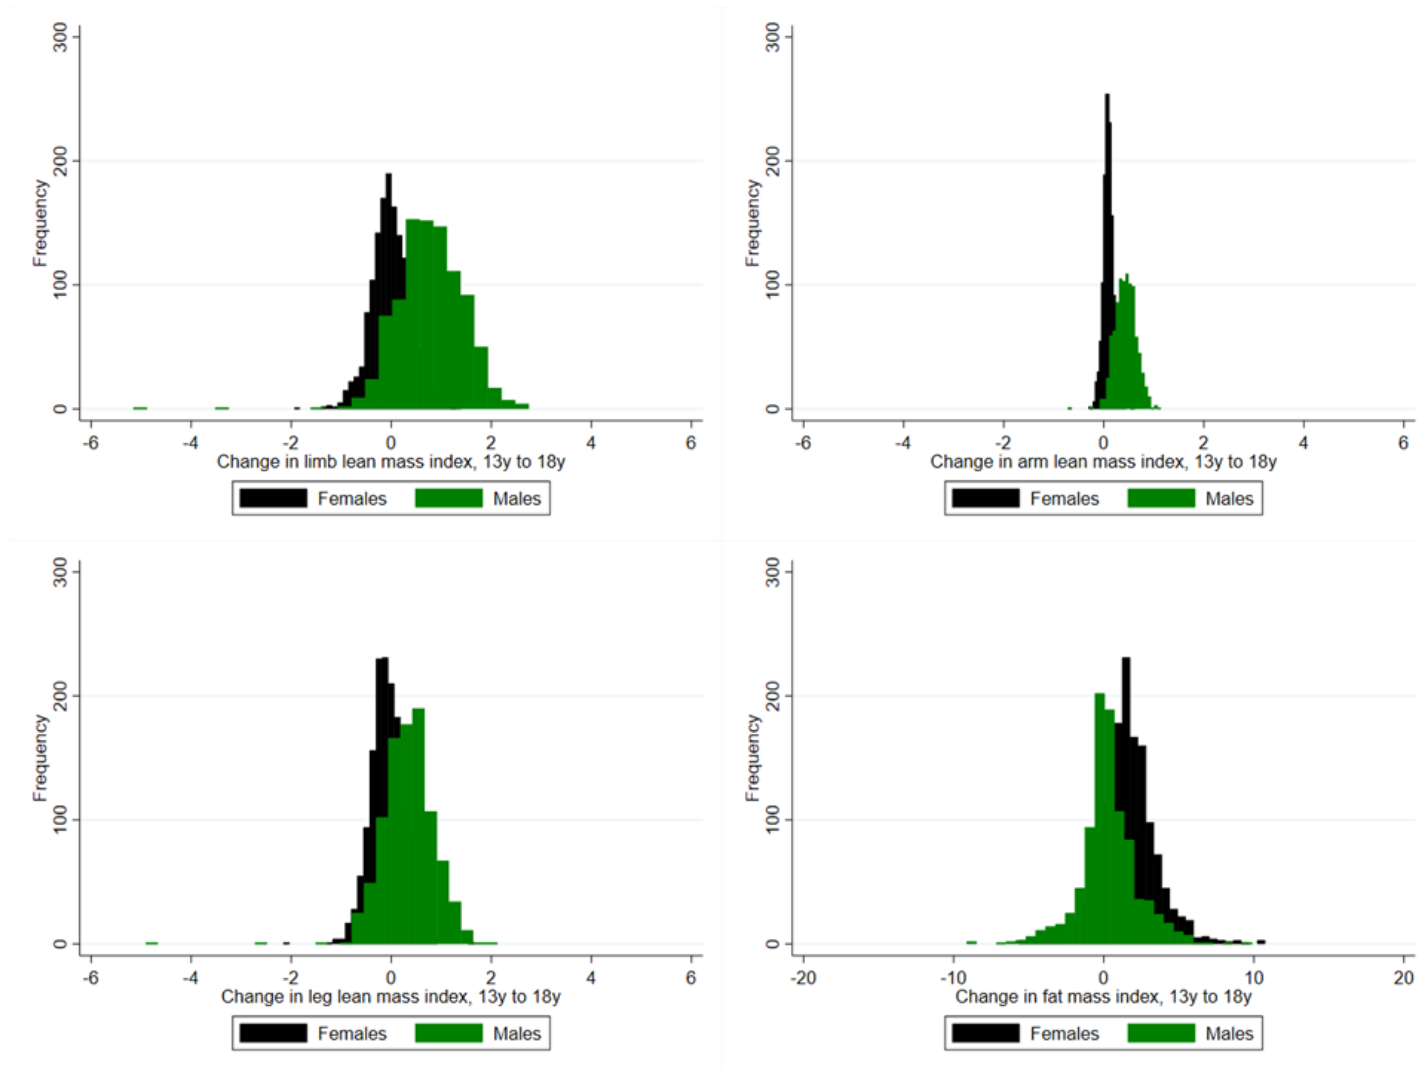

Change values are based on difference scores (18y value minus 13y value), in original units (kg/m<sup>2</sup>).
