# Supplementary material for: Body muscle gain and markers of cardiovascular disease susceptibility in young adulthood: A cohort study
Source: PubMed Central journal article supplement (PMC8428664; doi:10.1371/journal.pmed.1003751), 2021-09-09
Supplement: pmed.1003751.s010.pdf [file pmed.1003751.s010.pdf]

**S9 Fig** Sex-specific changes in lean and fat mass indices in young adulthood

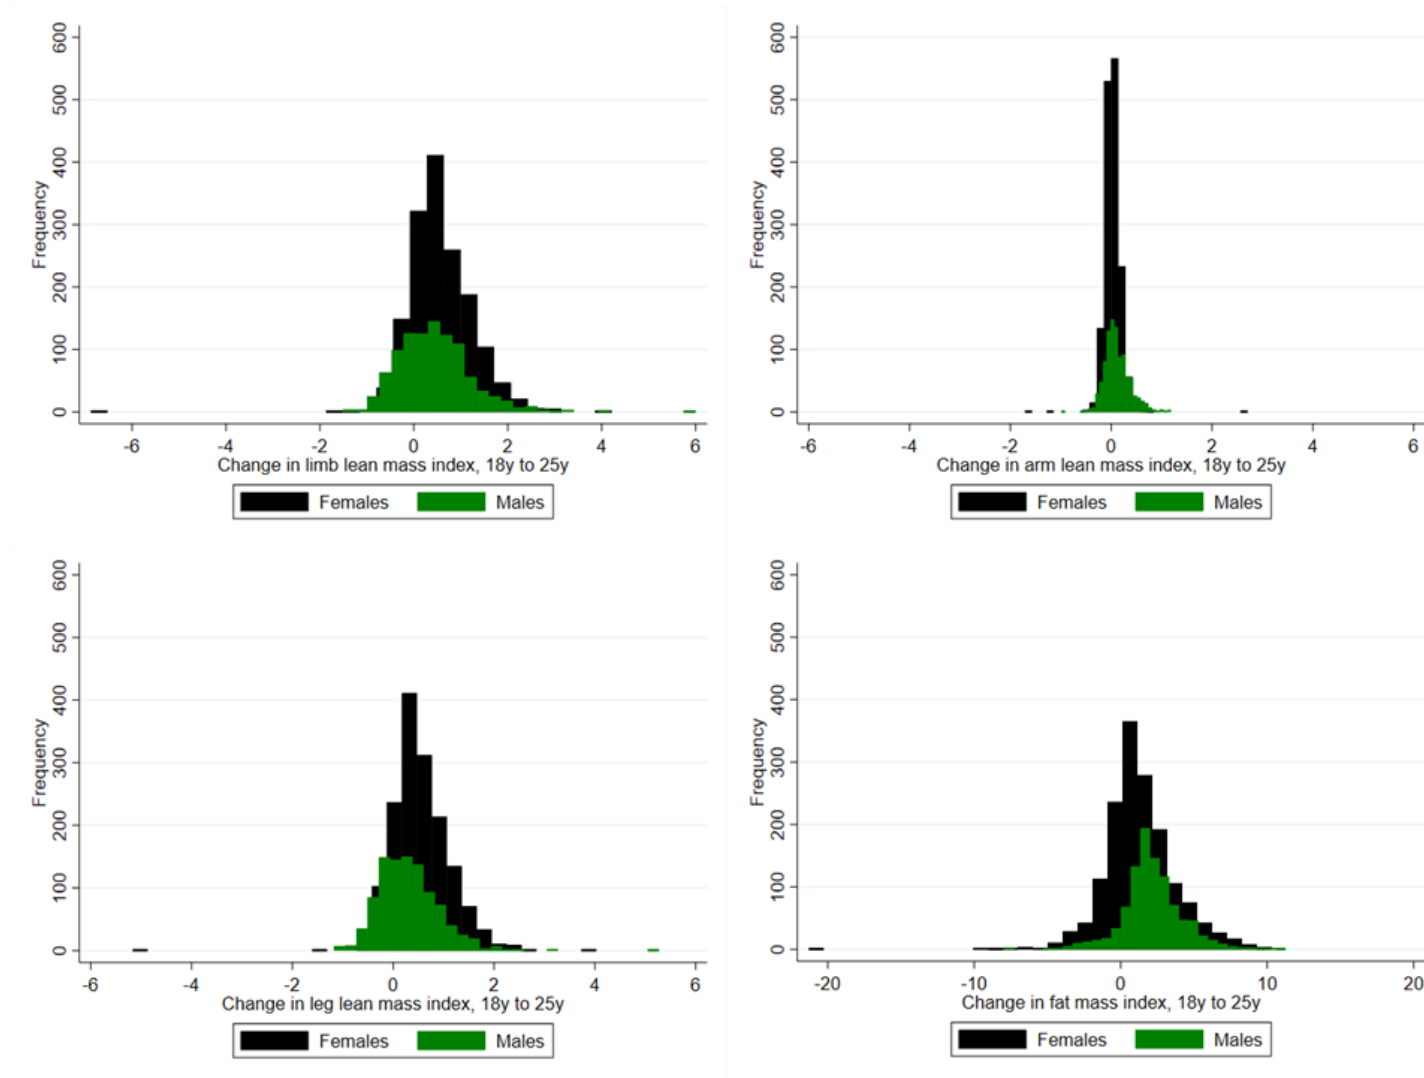

Change values are based on difference scores (25y value minus 18y value), in original units ( $\text{kg/m}^2$ ).
