# Supplementary material for: Body muscle gain and markers of cardiovascular disease susceptibility in young adulthood: A cohort study
Source: PubMed Central journal article supplement (PMC8428664; doi:10.1371/journal.pmed.1003751), 2021-09-09
Supplement: pmed.1003751.s011.pdf [file pmed.1003751.s011.pdf]

**S10 Fig** Sex-specific changes in handgrip strength from childhood to young adulthood

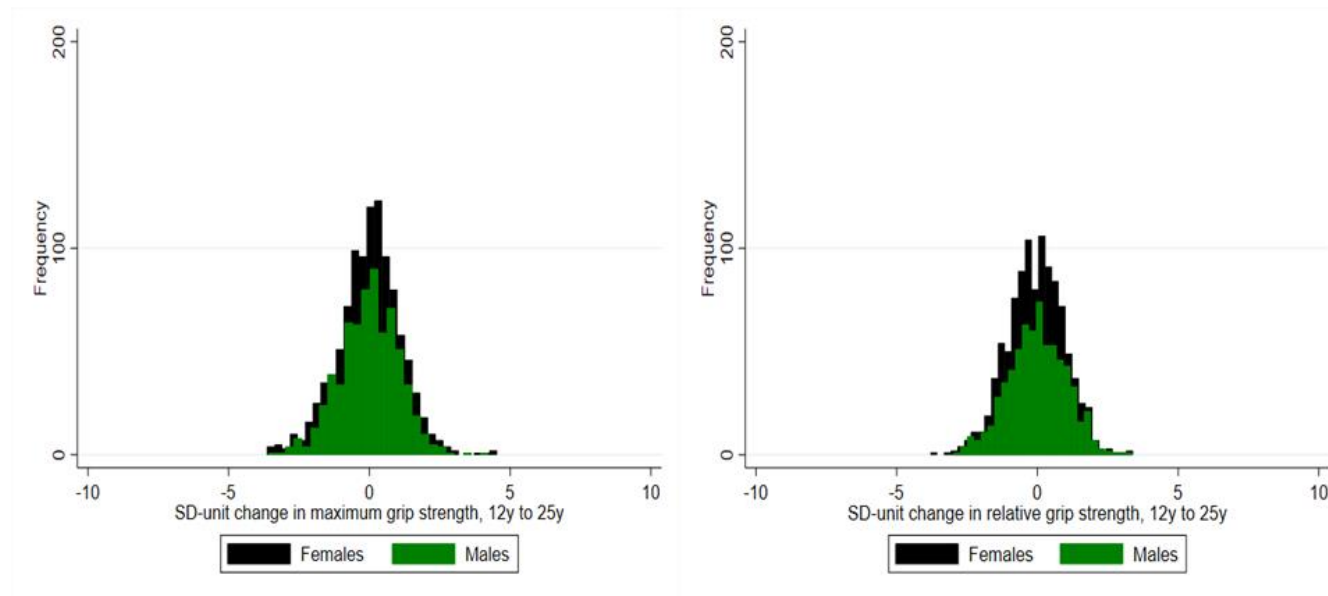

Change values are based on difference in SD units (25y z-score value minus 12y z-score value), given different original measurement units between occasions.
