# Supplementary material for: Body muscle gain and markers of cardiovascular disease susceptibility in young adulthood: A cohort study
Source: PubMed Central journal article supplement (PMC8428664; doi:10.1371/journal.pmed.1003751), 2021-09-09
Supplement: pmed.1003751.s013.pdf [file pmed.1003751.s013.pdf]

**S1 Table** Characteristics of 12,418 ALSPAC G1 offspring not eligible for present analyses

| <i>Characteristics</i>                                              | <i>N</i> | <i>Overall</i><br><i>N=11,816</i> | <i>N</i> | <i>Males</i><br><i>N=6,438</i> | <i>N</i> | <i>Females</i><br><i>N=5,378</i> |
|---------------------------------------------------------------------|----------|-----------------------------------|----------|--------------------------------|----------|----------------------------------|
| Non-white ethnicity – % (N)                                         | 8913     | 5.5 (487)                         | 4990     | 5.4 (269)                      | 3908     | 5.5 (216)                        |
| Highest maternal education is degree – % (N)                        | 9256     | 10.1 (933)                        | 5182     | 10.2 (530)                     | 4057     | 9.9 (400)                        |
| Age (y) at peak height velocity                                     | 2778     | 12.8 (1.3)                        | 1526     | 13.6 (0.9)                     | 1249     | 11.7 (0.8)                       |
| Smoking at 25y – % (N)                                              | 775      |                                   | 242      |                                | 532      |                                  |
| Never                                                               |          | 36.4 (282)                        |          | 39.7 (96)                      |          | 34.8 (185)                       |
| Less than weekly                                                    |          | 58.5 (453)                        |          | 57.0 (138)                     |          | 59.2 (315)                       |
| Every week                                                          |          | 5.2 (40)                          |          | 3.3 (8)                        |          | 6.0 (32)                         |
| Alcohol consumption at 25y – % (N)                                  | 748      |                                   | 232      |                                | 515      |                                  |
| Never/monthly/less than monthly                                     |          | 32.0 (239)                        |          | 27.6 (64)                      |          | 33.8 (174)                       |
| 2 to 4 times per month                                              |          | 41.4 (310)                        |          | 40.1 (93)                      |          | 42.1 (217)                       |
| 2 or more times per week                                            |          | 26.6 (199)                        |          | 32.3 (75)                      |          | 24.1 (124)                       |
| Total limb lean mass index (kg/m <sup>2</sup> ) at 25y              | 732      | 7.2 (1.3)                         | 234      | 8.2 (1.2)                      | 497      | 6.7 (1.0)                        |
| Arm lean mass index (kg/m <sup>2</sup> ) at 25y                     | 732      | 1.7 (0.4)                         | 234      | 2.2 (0.4)                      | 497      | 1.5 (0.2)                        |
| Leg lean mass index (kg/m <sup>2</sup> ) at 25y                     | 732      | 5.5 (0.9)                         | 234      | 6.0 (0.9)                      | 497      | 5.2 (0.8)                        |
| Maximum grip strength (lb/in <sup>2</sup> ) at 25y                  | 305      | 14.0 (3.8)                        | 102      | 17.5 (3.8)                     | 203      | 12.2 (2.4)                       |
| Relative grip strength (lb/in <sup>2</sup> /kg) at 25y              | 300      | 0.2 (0.1)                         | 101      | 0.2 (0.1)                      | 199      | 0.2 (0.04)                       |
| Total fat mass index (kg/m <sup>2</sup> ) at 25y                    | 732      | 8.7 (4.3)                         | 234      | 6.6 (3.1)                      | 497      | 9.7 (4.4)                        |
| <b><i>Changes from childhood to young adulthood, 10y to 25y</i></b> |          |                                   |          |                                |          |                                  |
| Total limb lean mass index (kg/m <sup>2</sup> )                     | 237      | 1.9 (1.1)                         | 91       | 2.7 (1.1)                      | 146      | 1.4 (0.8)                        |
| Arm lean mass index (kg/m <sup>2</sup> )                            | 237      | 0.6 (0.4)                         | 91       | 1.0 (0.4)                      | 146      | 0.3 (0.2)                        |
| Leg lean mass index (kg/m <sup>2</sup> )                            | 237      | 1.3 (0.8)                         | 91       | 1.7 (0.8)                      | 146      | 1.1 (0.6)                        |
| Maximum grip strength (SD)*                                         | 134      | 0.1 (1.1)                         | 47       | 0.1 (1.0)                      | 87       | 0.1 (1.1)                        |
| Relative grip strength (SD)*                                        | 132      | 0.1 (1.0)                         | 47       | 0.2 (1.0)                      | 85       | 0.1 (1.0)                        |
| Total fat mass index (kg/m <sup>2</sup> )                           | 237      | 3.8 (3.1)                         | 91       | 2.8 (2.6)                      | 146      | 4.4 (3.2)                        |
| <b><i>Changes in childhood, 10y to 13y</i></b>                      |          |                                   |          |                                |          |                                  |
| Total limb lean mass index (kg/m <sup>2</sup> )                     | 2690     | 1.0 (0.6)                         | 1542     | 1.3 (0.6)                      | 1143     | 0.7 (0.4)                        |
| Arm lean mass index (kg/m <sup>2</sup> )                            | 2690     | 0.3 (0.2)                         | 1542     | 0.4 (0.2)                      | 1143     | 0.2 (0.1)                        |
| Leg lean mass index (kg/m <sup>2</sup> )                            | 2690     | 0.7 (0.4)                         | 1542     | 0.9 (0.4)                      | 1143     | 0.5 (0.3)                        |
| Total fat mass index (kg/m <sup>2</sup> )                           | 2690     | 0.9 (1.8)                         | 1542     | 0.5 (1.8)                      | 1143     | 1.4 (1.6)                        |
| <b><i>Changes in adolescence, 13y to 18y</i></b>                    |          |                                   |          |                                |          |                                  |
| Total limb lean mass index (kg/m <sup>2</sup> )                     | 1552     | 0.5 (0.7)                         | 843      | 0.9 (0.7)                      | 708      | -0.03 (0.4)                      |
| Arm lean mass index (kg/m <sup>2</sup> )                            | 1552     | 0.3 (0.3)                         | 843      | 0.5 (0.2)                      | 708      | 0.1 (0.1)                        |
| Leg lean mass index (kg/m <sup>2</sup> )                            | 1552     | 0.2 (0.5)                         | 843      | 0.4 (0.5)                      | 708      | -0.1 (0.4)                       |
| Total fat mass index (kg/m <sup>2</sup> )                           | 1552     | 1.0 (2.1)                         | 843      | 0.5 (2.0)                      | 708      | 1.7 (1.9)                        |
| <b><i>Changes in young adulthood, 18y to 25y</i></b>                |          |                                   |          |                                |          |                                  |
| Total limb lean mass index (kg/m <sup>2</sup> )                     | 306      | 0.6 (0.7)                         | 102      | 0.5 (0.8)                      | 204      | 0.7 (0.7)                        |
| Arm lean mass index (kg/m <sup>2</sup> )                            | 306      | 0.1 (0.2)                         | 102      | 0.1 (0.3)                      | 204      | 0.04 (0.2)                       |
| Leg lean mass index (kg/m <sup>2</sup> )                            | 306      | 0.5 (0.6)                         | 102      | 0.3 (0.6)                      | 204      | 0.6 (0.6)                        |
| Total fat mass index (kg/m <sup>2</sup> )                           | 306      | 1.7 (2.4)                         | 102      | 2.2 (2.2)                      | 204      | 1.4 (2.4)                        |

Values are mean (SD) unless otherwise noted. Described are those without data on each lean, grip, and fat measure on any occasion, at least 1 cardiometabolic trait at 25y, and each covariate used for models. \*Change is from age 12y to 25y and is based on difference in SD units given different original measurement units between occasions.
