# Supplementary material for: Body muscle gain and markers of cardiovascular disease susceptibility in young adulthood: A cohort study
Source: PubMed Central journal article supplement (PMC8428664; doi:10.1371/journal.pmed.1003751), 2021-09-09
Supplement: pmed.1003751.s014.pdf [file pmed.1003751.s014.pdf]

**S2 Table** Pearson correlations between changes in limb lean mass indices and total fat mass index, 10y to 25y

|                                  | Limb lean mass<br>index, 10y to 25y | Arm lean mass<br>index, 10y to 25y | Leg lean mass<br>index, 10y to 25y | Total fat mass<br>index, 10y to 25y |
|----------------------------------|-------------------------------------|------------------------------------|------------------------------------|-------------------------------------|
| Limb lean mass index, 10y to 25y | 1.00                                | 0.78                               | 0.97                               | 0.47                                |
| Arm lean mass index, 10y to 25y  | -                                   | 1.00                               | 0.60                               | 0.39                                |
| Leg lean mass index, 10y to 25y  | -                                   | -                                  | 1.00                               | 0.45                                |
| Total fat mass index, 10y to 25y | -                                   | -                                  | -                                  | 1.00                                |
