# Supplementary material for: Body muscle gain and markers of cardiovascular disease susceptibility in young adulthood: A cohort study
Source: PubMed Central journal article supplement (PMC8428664; doi:10.1371/journal.pmed.1003751), 2021-09-09
Supplement: pmed.1003751.s015.pdf [file pmed.1003751.s015.pdf]

**S3 Table** Pearson correlations amongst changes in limb lean mass indices, total fat mass index, and grip strength, 12y to 25y

|                                    | Limb lean mass index, 12y to 25y | Arm lean mass index, 12y to 25y | Leg lean mass index, 12y to 25y | Maximum grip strength, 12y to 25y | Relative grip strength, 12y to 25y | Total fat mass index, 12y to 25y |
|------------------------------------|----------------------------------|---------------------------------|---------------------------------|-----------------------------------|------------------------------------|----------------------------------|
| Limb lean mass index, 12y to 25y   | 1.00                             | 0.81                            | 0.97                            | 0.33                              | -0.12                              | 0.39                             |
| Arm lean mass index, 12y to 25y    | -                                | 1.00                            | 0.66                            | 0.34                              | -0.07                              | 0.30                             |
| Leg lean mass index, 12y to 25y    | -                                | -                               | 1.00                            | 0.30                              | -0.13                              | 0.39                             |
| Maximum grip strength, 12y to 25y  | -                                | -                               | -                               | 1.00                              | 0.76                               | 0.03                             |
| Relative grip strength, 12y to 25y | -                                | -                               | -                               | -                                 | 1.00                               | -0.44                            |
| Total fat mass index, 12y to 25y   | -                                | -                               | -                               | -                                 | -                                  | 1.00                             |
