# Supplementary material for: Body muscle gain and markers of cardiovascular disease susceptibility in young adulthood: A cohort study
Source: PubMed Central journal article supplement (PMC8428664; doi:10.1371/journal.pmed.1003751), 2021-09-09
Supplement: pmed.1003751.s016.pdf [file pmed.1003751.s016.pdf]

**S4 Table** Pearson correlations between change in limb lean mass indices and total fat mass index, 10y to 13y

|                                  | Limb lean<br>mass index,<br>10y to 13y | Arm lean<br>mass index,<br>10y to 13y | Leg lean<br>mass index,<br>10y to 13y | Total fat<br>mass index,<br>10y to 13y |
|----------------------------------|----------------------------------------|---------------------------------------|---------------------------------------|----------------------------------------|
| Limb lean mass index, 10y to 13y | 1.00                                   | 0.83                                  | 0.98                                  | 0.09                                   |
| Arm lean mass index, 10y to 13y  | -                                      | 1.00                                  | 0.69                                  | 0.14                                   |
| Leg lean mass index, 10y to 13y  | -                                      | -                                     | 1.00                                  | 0.06                                   |
| Total fat mass index, 10y to 13y | -                                      | -                                     | -                                     | 1.00                                   |
