# Supplementary material for: Body muscle gain and markers of cardiovascular disease susceptibility in young adulthood: A cohort study
Source: PubMed Central journal article supplement (PMC8428664; doi:10.1371/journal.pmed.1003751), 2021-09-09
Supplement: pmed.1003751.s017.pdf [file pmed.1003751.s017.pdf]

**S5 Table** Pearson correlations between change in limb lean mass indices and total fat mass index, 13y to 18y

|                                  | Limb lean<br>mass index,<br>13y to 18y | Arm lean<br>mass index,<br>13y to 18y | Leg lean<br>mass index,<br>13y to 18y | Total fat<br>mass index,<br>13y to 18y |
|----------------------------------|----------------------------------------|---------------------------------------|---------------------------------------|----------------------------------------|
| Limb lean mass index, 13y to 18y | 1.00                                   | 0.74                                  | 0.97                                  | 0.11                                   |
| Arm lean mass index, 13y to 18y  | -                                      | 1.00                                  | 0.57                                  | 0.12                                   |
| Leg lean mass index, 13y to 18y  | -                                      | -                                     | 1.00                                  | 0.09                                   |
| Total fat mass index, 13y to 18y | -                                      | -                                     | -                                     | 1.00                                   |
