# Supplementary material for: Body muscle gain and markers of cardiovascular disease susceptibility in young adulthood: A cohort study
Source: PLOS journal article supplement (doi:10.1371/journal.pmed.1003751), 2021-09-09

**S2 Fig** Sex-specific distributions of lean and fat mass indices ( $\text{kg}/\text{m}^2$ ) at age 13y

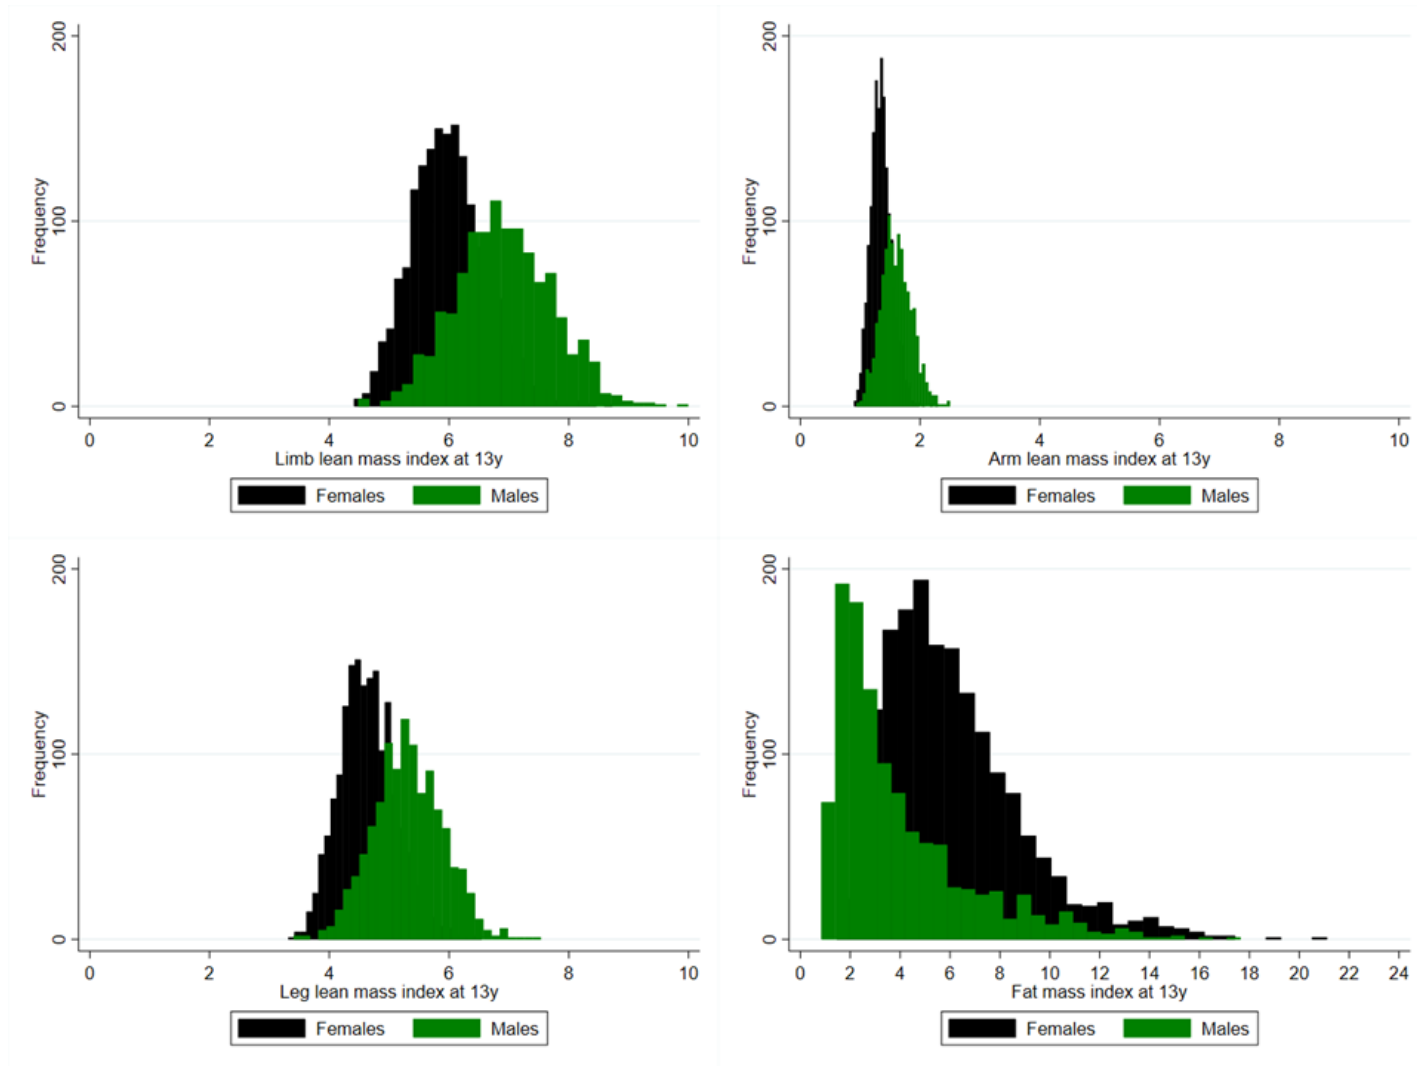

Supplement: S3 (10.1371/journal.pmed.1003751.s003) [file journal.pmed.1003751.s003]
