# Supplementary material for: Body muscle gain and markers of cardiovascular disease susceptibility in young adulthood: A cohort study
Source: PLoS Med. 2021 Sep 9;18(9):e1003751. doi: 10.1371/journal.pmed.1003751 (PMC8428664; doi:10.1371/journal.pmed.1003751)
Supplement: S15 Table — (XLSX) [file pmed.1003751.s027.xlsx]

## Sheet: S15 Table
S15 Table Associations of change in lean mass indices in adolescence with cardiometabolic traits in young adulthood among ALSPAC G1 females
	Change in lean mass indices from age 13y to 18y (per SD-unit gain, females)
	Total limb lean mass index						Arm lean mass index						Leg lean mass index
	Adj. for age, ethnicity, maternal education,						Adj. for age, ethnicity, maternal education,						Adj. for age, ethnicity, maternal education,
	puberty timing, limb lean mass index at 13y,						puberty timing, arm lean mass index at 13y,						puberty timing, leg lean mass index at 13y,
	change in total fat mass index						change in leg lean mass index,						change in arm lean mass index,
							change in total fat mass index						change in total fat mass index
Standardized outcome at age 25y	N	Beta	LCL	UCL	P-value		N	Beta	LCL	UCL	P-value		N	Beta	LCL	UCL	P-value
Systolic blood pressure	1427	0.203941	0.11523	0.292651	7.03e-06		1427	0.0541913	-0.0630549	0.171437	0.364735		1427	0.199162	0.0978454	0.300478	0.0001204
Diastolic blood pressure	1427	0.0982917	-0.0005524	0.197136	0.0512924		1427	-0.0769433	-0.189052	0.0351649	0.17841		1427	0.154352	0.0541196	0.254584	0.0025662
Concentration of chylomicrons and extremely large VLDL particles	1097	0.0393643	-0.0507039	0.129433	0.391326		1097	-0.0531602	-0.152077	0.045756	0.291883		1097	0.0764667	-0.0119947	0.164928	0.0901538
Total lipids in chylomicrons and extremely large VLDL	1097	0.0378644	-0.0522657	0.127995	0.409941		1097	-0.0541124	-0.153104	0.0448796	0.283699		1097	0.0754434	-0.0130394	0.163926	0.094616
Phospholipids in chylomicrons and extremely large VLDL	1097	0.0267998	-0.0644407	0.11804	0.564507		1097	-0.0602855	-0.159918	0.0393467	0.235385		1097	0.0669892	-0.0225252	0.156503	0.142285
Total cholesterol in chylomicrons and extremely large VLDL	1097	0.025987	-0.0650904	0.117064	0.575692		1097	-0.0651702	-0.165337	0.0349965	0.202013		1097	0.0693394	-0.0194183	0.158097	0.125598
Cholesterol esters in chylomicrons and extremely large VLDL	1097	0.0351512	-0.0561186	0.126421	0.449997		1097	-0.0685428	-0.16871	0.0316239	0.179657		1097	0.0805885	-0.0081453	0.169322	0.0750228
Free cholesterol in chylomicrons and extremely large VLDL	1097	0.014734	-0.0768965	0.106365	0.752436		1097	-0.0596828	-0.160259	0.0408935	0.244535		1097	0.0546186	-0.0348438	0.144081	0.231204
Triglycerides in chylomicrons and extremely large VLDL	1097	0.0425445	-0.0474092	0.132498	0.353604		1097	-0.0500131	-0.148761	0.0487351	0.320555		1097	0.0780392	-0.0103773	0.166456	0.0835829
Concentration of very large VLDL particles	1097	0.0178861	-0.0753654	0.111138	0.70673		1097	-0.0556696	-0.158916	0.0475765	0.2903		1097	0.0570722	-0.0347165	0.148861	0.222721
Total lipids in very large VLDL	1097	0.0179014	-0.0750595	0.110862	0.705617		1097	-0.0561445	-0.159169	0.0468804	0.285174		1097	0.0572665	-0.0342754	0.148809	0.21991
Phospholipids in very large VLDL	1097	0.0138971	-0.0795804	0.107375	0.770565		1097	-0.0621093	-0.165198	0.0409796	0.2374		1097	0.0559569	-0.0361939	0.148108	0.233725
Total cholesterol in very large VLDL	1097	0.0220502	-0.0676979	0.111798	0.629846		1097	-0.0584552	-0.158979	0.0420688	0.254121		1097	0.0620906	-0.0264013	0.150583	0.168873
Cholesterol esters in very large VLDL	1097	0.0283667	-0.0607643	0.117498	0.532449		1097	-0.0578236	-0.158145	0.0424974	0.258323		1097	0.0685701	-0.0191504	0.156291	0.125372
Free cholesterol in very large VLDL	1097	0.0146086	-0.0760096	0.105227	0.751822		1097	-0.0589916	-0.159893	0.0419095	0.251565		1097	0.0543239	-0.0351862	0.143834	0.233979
Triglycerides in very large VLDL	1097	0.0176364	-0.0763552	0.111628	0.712815		1097	-0.0536764	-0.157477	0.050124	0.310498		1097	0.0559181	-0.0364625	0.148299	0.235214
Concentration of large VLDL particles	1097	0.024823	-0.0728825	0.122529	0.61823		1097	-0.0501194	-0.156574	0.0563356	0.355801		1097	0.0622465	-0.0330921	0.157585	0.200437
Total lipids in large VLDL	1097	0.0241069	-0.0734862	0.1217	0.628002		1097	-0.0510539	-0.157395	0.0552873	0.346392		1097	0.0619979	-0.0331998	0.157195	0.201572
Phospholipids in large VLDL	1097	0.0190746	-0.0798939	0.118043	0.705375		1097	-0.054546	-0.161429	0.0523369	0.316879		1097	0.0590187	-0.0369843	0.155022	0.227984
Total cholesterol in large VLDL	1097	0.0240843	-0.0721069	0.120275	0.623327		1097	-0.0566703	-0.161784	0.0484434	0.290354		1097	0.0649115	-0.0286441	0.158467	0.173671
Cholesterol esters in large VLDL	1097	0.0376714	-0.0583777	0.13372	0.44172		1097	-0.0525746	-0.157697	0.0525481	0.326651		1097	0.0772445	-0.015947	0.170436	0.104157
Free cholesterol in large VLDL	1097	0.0104758	-0.0861649	0.107117	0.831604		1097	-0.0602199	-0.165709	0.0452697	0.262912		1097	0.0521878	-0.0421752	0.146551	0.278085
Triglycerides in large VLDL	1097	0.0255463	-0.0722447	0.123337	0.60835		1097	-0.0477588	-0.154426	0.0589082	0.379851		1097	0.0616117	-0.034012	0.157235	0.206414
Concentration of medium VLDL particles	1097	0.0523637	-0.047015	0.151742	0.301423		1097	-0.0434221	-0.151424	0.0645798	0.430353		1097	0.0863236	-0.0113966	0.184044	0.0833234
Total lipids in medium VLDL	1097	0.0509889	-0.0487313	0.150709	0.315946		1097	-0.0445217	-0.152621	0.0635773	0.419191		1097	0.0855783	-0.0123065	0.183463	0.0865459
Phospholipids in medium VLDL	1097	0.0465109	-0.0541931	0.147215	0.365013		1097	-0.0500574	-0.158774	0.0586597	0.366489		1097	0.0840539	-0.0143995	0.182507	0.0941881
Total cholesterol in medium VLDL	1097	0.0451798	-0.0577743	0.148134	0.389396		1097	-0.0515906	-0.160487	0.0573058	0.352792		1097	0.0840549	-0.0156381	0.183748	0.0983427
Cholesterol esters in medium VLDL	1097	0.05544	-0.049179	0.160059	0.298669		1097	-0.0520002	-0.161399	0.0573984	0.3512		1097	0.0950266	-0.0062239	0.196277	0.0658155
Free cholesterol in medium VLDL	1097	0.0327652	-0.0686941	0.134224	0.526439		1097	-0.0496963	-0.158323	0.0589305	0.369557		1097	0.0697793	-0.0284845	0.168043	0.163794
Triglycerides in medium VLDL	1097	0.0546058	-0.0435769	0.152789	0.275392		1097	-0.038907	-0.146542	0.0687284	0.478315		1097	0.0858448	-0.0111701	0.18286	0.0828064
Concentration of small VLDL particles	1097	0.0328289	-0.0746827	0.140341	0.5492		1097	-0.0616264	-0.174757	0.0515043	0.285372		1097	0.0778714	-0.0250527	0.180795	0.137955
Total lipids in small VLDL	1097	0.0301064	-0.0783699	0.138583	0.586159		1097	-0.0635975	-0.177207	0.0500122	0.272277		1097	0.0763243	-0.0271855	0.179834	0.148236
Phospholipids in small VLDL	1097	-0.0072776	-0.119631	0.105075	0.898887		1097	-0.0713997	-0.186859	0.0440591	0.225243		1097	0.0433117	-0.0616556	0.148279	0.418333
Total cholesterol in small VLDL	1097	0.0349031	-0.0781894	0.147996	0.544929		1097	-0.0675588	-0.183511	0.0483935	0.253193		1097	0.0833312	-0.023334	0.189996	0.125589
Cholesterol esters in small VLDL	1097	0.0574598	-0.0552882	0.170208	0.317547		1097	-0.0612576	-0.177044	0.0545284	0.299457		1097	0.102268	-0.0045331	0.209068	0.0605301
Free cholesterol in small VLDL	1097	-0.0081343	-0.121911	0.105643	0.888464		1097	-0.0736334	-0.190212	0.0429456	0.215491		1097	0.0430508	-0.0633372	0.149439	0.427368
Triglycerides in small VLDL	1097	0.039533	-0.0640028	0.143069	0.453895		1097	-0.0515804	-0.163027	0.0598661	0.364008		1097	0.0780814	-0.022329	0.178492	0.127347
Concentration of very small VLDL particles	1097	0.0127481	-0.106048	0.131545	0.833271		1097	-0.0937706	-0.213057	0.0255157	0.123258		1097	0.0721922	-0.0366797	0.181064	0.193504
Total lipids in very small VLDL	1097	0.0166539	-0.101678	0.134985	0.782485		1097	-0.090786	-0.209669	0.0280966	0.134315		1097	0.0741163	-0.0343688	0.182601	0.180354
Phospholipids in very small VLDL	1097	-0.0025	-0.119952	0.114952	0.966694		1097	-0.0859433	-0.202573	0.0306868	0.148498		1097	0.0514105	-0.0558846	0.158706	0.347341
Total cholesterol in very small VLDL	1097	0.0471445	-0.0686775	0.162966	0.424651		1097	-0.0777137	-0.195941	0.0405141	0.197407		1097	0.0959769	-0.0111156	0.203069	0.0789455
Cholesterol esters in very small VLDL	1097	0.0628373	-0.0521625	0.177837	0.283894		1097	-0.0783175	-0.196986	0.0403511	0.19561		1097	0.111733	0.0043402	0.219125	0.0414474
Free cholesterol in very small VLDL	1097	0.0113314	-0.106918	0.129581	0.850892		1097	-0.072961	-0.191021	0.0450994	0.225545		1097	0.0578027	-0.0501373	0.165743	0.293608
Triglycerides in very small VLDL	1097	-0.0261785	-0.147249	0.0948924	0.671457		1097	-0.0978208	-0.221331	0.0256894	0.120467		1097	0.0371839	-0.0733898	0.147758	0.509499
Concentration of IDL particles	1097	-0.0255782	-0.143483	0.0923268	0.670434		1097	-0.0803713	-0.19784	0.0370977	0.179718		1097	0.0222592	-0.0854499	0.129968	0.68519
Total lipids in IDL	1097	-0.0229618	-0.140504	0.0945802	0.701568		1097	-0.0764863	-0.193719	0.0407463	0.200759		1097	0.0225152	-0.0849725	0.130003	0.681149
Phospholipids in IDL	1097	-0.0229124	-0.140322	0.0944973	0.70186		1097	-0.0759763	-0.1929	0.0409474	0.202584		1097	0.0221724	-0.0851364	0.129481	0.685246
Total cholesterol in IDL	1097	-0.0112305	-0.12749	0.105029	0.849705		1097	-0.0642393	-0.180745	0.0522666	0.279539		1097	0.0272237	-0.0795367	0.133984	0.616934
Cholesterol esters in IDL	1097	-0.0048475	-0.120412	0.110717	0.934419		1097	-0.0628577	-0.17888	0.0531648	0.288001		1097	0.0334527	-0.0729324	0.139838	0.537366
Free cholesterol in IDL	1097	-0.0274519	-0.144713	0.0898088	0.646068		1097	-0.0664849	-0.183891	0.0509208	0.266757		1097	0.0106139	-0.0967229	0.117951	0.846192
Triglycerides in IDL	1097	-0.0995744	-0.228777	0.0296285	0.130775		1097	-0.141561	-0.270082	-0.0130409	0.0308942		1097	-0.0170942	-0.132749	0.0985609	0.771862
Concentration of large LDL particles	1097	-0.0375985	-0.156191	0.0809943	0.534021		1097	-0.0718431	-0.189	0.045314	0.229149		1097	0.0051021	-0.103424	0.113629	0.92652
Total lipids in large LDL	1097	-0.0337009	-0.152013	0.0846112	0.576336		1097	-0.0686018	-0.18565	0.0484465	0.250391		1097	0.0070689	-0.10132	0.115458	0.898198
Phospholipids in large LDL	1097	-0.0360083	-0.153611	0.0815948	0.548111		1097	-0.0679542	-0.184128	0.04822	0.251333		1097	0.0049149	-0.103119	0.112949	0.928887
Total cholesterol in large LDL	1097	-0.0204659	-0.138111	0.097179	0.732912		1097	-0.0587831	-0.175701	0.058135	0.3241		1097	0.0147565	-0.0933502	0.122863	0.788879
Cholesterol esters in large LDL	1097	-0.0169431	-0.134469	0.100583	0.777328		1097	-0.0581547	-0.174986	0.058677	0.32894		1097	0.0183954	-0.089747	0.126538	0.738618
Free cholesterol in large LDL	1097	-0.0313518	-0.148816	0.086112	0.600587		1097	-0.060046	-0.176985	0.0568927	0.313904		1097	0.0030489	-0.104626	0.110724	0.955702
Triglycerides in large LDL	1097	-0.14825	-0.275621	-0.0208798	0.0225753		1097	-0.144985	-0.268387	-0.021583	0.0213359		1097	-0.0663641	-0.179402	0.0466736	0.249585
Concentration of medium LDL particles	1097	-0.0483648	-0.169829	0.0730991	0.4348		1097	-0.0629194	-0.181334	0.0554951	0.297371		1097	-0.0107082	-0.122535	0.101118	0.850997
Total lipids in medium LDL	1097	-0.045568	-0.16711	0.0759741	0.462108		1097	-0.0596344	-0.178134	0.0588651	0.323645		1097	-0.0098331	-0.121882	0.102216	0.863318
Phospholipids in medium LDL	1097	-0.0617733	-0.183274	0.0597275	0.318698		1097	-0.0672649	-0.18539	0.0508601	0.264103		1097	-0.0207267	-0.133281	0.0918272	0.717924
Total cholesterol in medium LDL	1097	-0.0286462	-0.149475	0.0921824	0.641889		1097	-0.0486694	-0.167074	0.0697351	0.420114		1097	0.0007663	-0.110862	0.112395	0.989256
Cholesterol esters in medium LDL	1097	-0.0193424	-0.138948	0.100263	0.751065		1097	-0.0479865	-0.165878	0.0699048	0.424654		1097	0.0099299	-0.100488	0.120348	0.859968
Free cholesterol in medium LDL	1097	-0.0644191	-0.19034	0.0615017	0.315696		1097	-0.0503785	-0.171361	0.0706045	0.414074		1097	-0.0350292	-0.151979	0.0819205	0.556849
Triglycerides in medium LDL	1097	-0.181985	-0.308424	-0.0555471	0.0048271		1097	-0.143536	-0.264553	-0.0225194	0.0201336		1097	-0.101484	-0.213615	0.0106464	0.0760373
Concentration of small LDL particles	1097	-0.0669134	-0.191888	0.0580615	0.293693		1097	-0.0588655	-0.179129	0.0613977	0.337058		1097	-0.0317972	-0.147577	0.0839829	0.590084
Total lipids in small LDL	1097	-0.06467	-0.189836	0.0604965	0.31091		1097	-0.0557932	-0.176249	0.0646626	0.363637		1097	-0.0314314	-0.147527	0.0846645	0.595371
Phospholipids in small LDL	1097	-0.101663	-0.231014	0.0276877	0.123328		1097	-0.0608989	-0.184151	0.0623535	0.332513		1097	-0.0652481	-0.186561	0.0560645	0.291502
Total cholesterol in small LDL	1097	-0.0429473	-0.166389	0.080495	0.494968		1097	-0.0459817	-0.165756	0.0737929	0.451449		1097	-0.0155833	-0.129993	0.0988263	0.789322
Cholesterol esters in small LDL	1097	-0.0308524	-0.152238	0.0905336	0.618081		1097	-0.0461813	-0.16495	0.0725878	0.44566		1097	-0.0031764	-0.115422	0.109069	0.95573
Free cholesterol in small LDL	1097	-0.0832318	-0.214179	0.0477153	0.212604		1097	-0.0436369	-0.168003	0.0807291	0.491304		1097	-0.0579359	-0.180638	0.0647664	0.354412
Triglycerides in small LDL	1097	-0.149616	-0.277249	-0.0219828	0.0216315		1097	-0.126613	-0.249309	-0.0039167	0.0431337		1097	-0.0743956	-0.188301	0.0395094	0.200272
Concentration of very large HDL particles	1097	-0.145737	-0.263807	-0.0276662	0.0156017		1097	-0.066129	-0.186077	0.0538187	0.279597		1097	-0.117184	-0.22875	-0.0056184	0.0395442
Total lipids in very large HDL	1097	-0.146052	-0.264058	-0.0280451	0.0153242		1097	-0.0658749	-0.185761	0.0540113	0.281201		1097	-0.117775	-0.229349	-0.0062018	0.0385744
Phospholipids in very large HDL	1097	-0.148935	-0.264451	-0.0334198	0.0115526		1097	-0.0644577	-0.182747	0.0538316	0.285214		1097	-0.120862	-0.230079	-0.0116449	0.0301201
Total cholesterol in very large HDL	1097	-0.139368	-0.259394	-0.0193407	0.0229008		1097	-0.0635938	-0.184918	0.05773	0.303947		1097	-0.11325	-0.226899	0.0003982	0.0508066
Cholesterol esters in very large HDL	1097	-0.131744	-0.253005	-0.0104841	0.0332474		1097	-0.0617162	-0.18419	0.0607576	0.323003		1097	-0.10663	-0.221196	0.0079363	0.0680903
Free cholesterol in very large HDL	1097	-0.153873	-0.270915	-0.0368299	0.0100225		1097	-0.0666936	-0.185524	0.0521367	0.271028		1097	-0.125952	-0.237259	-0.0146449	0.0266032
Triglycerides in very large HDL	1097	-0.0818863	-0.205965	0.0421921	0.195619		1097	-0.0760778	-0.198535	0.0463799	0.223108		1097	-0.0406919	-0.155496	0.0741117	0.486903
Concentration of large HDL particles	1097	-0.179869	-0.291298	-0.0684396	0.0015815		1097	-0.0549605	-0.170533	0.0606115	0.350973		1097	-0.155695	-0.260175	-0.0512143	0.0035279
Total lipids in large HDL	1097	-0.179174	-0.29054	-0.0678079	0.0016388		1097	-0.054098	-0.16969	0.0614942	0.358665		1097	-0.155603	-0.260091	-0.0511147	0.0035498
Phospholipids in large HDL	1097	-0.19219	-0.302905	-0.0814758	0.0006831		1097	-0.0567945	-0.171625	0.0580363	0.33203		1097	-0.16617	-0.270414	-0.0619264	0.0018083
Total cholesterol in large HDL	1097	-0.167666	-0.279544	-0.0557886	0.0033453		1097	-0.0489167	-0.165387	0.0675535	0.410069		1097	-0.147797	-0.252896	-0.0426977	0.00589
Cholesterol esters in large HDL	1097	-0.165405	-0.277459	-0.0533516	0.0038506		1097	-0.0489408	-0.165543	0.0676612	0.410368		1097	-0.14547	-0.250598	-0.0403417	0.0067306
Free cholesterol in large HDL	1097	-0.174688	-0.286076	-0.0632994	0.0021419		1097	-0.0487173	-0.16478	0.0673451	0.410339		1097	-0.155082	-0.260186	-0.0499784	0.0038653
Triglycerides in large HDL	1097	-0.126019	-0.250855	-0.001183	0.0478718		1097	-0.0779268	-0.201707	0.0458538	0.216992		1097	-0.0868187	-0.202922	0.0292847	0.1426
Concentration of medium HDL particles	1097	-0.193801	-0.317512	-0.0700902	0.002166		1097	-0.0391054	-0.168133	0.089922	0.552177		1097	-0.170969	-0.291959	-0.0499785	0.0056549
Total lipids in medium HDL	1097	-0.194181	-0.318228	-0.0701342	0.0021827		1097	-0.0367782	-0.166168	0.0926114	0.577144		1097	-0.172885	-0.294556	-0.0512146	0.0053948
Phospholipids in medium HDL	1097	-0.203621	-0.326926	-0.0803152	0.0012307		1097	-0.0501156	-0.177396	0.0771643	0.439937		1097	-0.175102	-0.294679	-0.0555264	0.0041413
Total cholesterol in medium HDL	1097	-0.185307	-0.311231	-0.0593827	0.0039608		1097	-0.0176957	-0.149787	0.114396	0.792708		1097	-0.175501	-0.301016	-0.0499849	0.006178
Cholesterol esters in medium HDL	1097	-0.181053	-0.307221	-0.0548839	0.0049552		1097	-0.0127481	-0.145533	0.120036	0.850615		1097	-0.173969	-0.300053	-0.047885	0.0068888
Free cholesterol in medium HDL	1097	-0.199213	-0.32426	-0.0741655	0.0018197		1097	-0.0354474	-0.164938	0.0940434	0.591289		1097	-0.179642	-0.302956	-0.0563274	0.0043389
Triglycerides in medium HDL	1097	-0.0098351	-0.137231	0.117561	0.879625		1097	-0.0782008	-0.201836	0.0454348	0.214844		1097	0.0435494	-0.0739486	0.161048	0.467229
Concentration of small HDL particles	1097	-0.154822	-0.298078	-0.0115665	0.0341837		1097	-0.0268804	-0.167178	0.113417	0.707034		1097	-0.135568	-0.274151	0.0030148	0.0551874
Total lipids in small HDL	1097	-0.155891	-0.299413	-0.0123685	0.033293		1097	-0.0252001	-0.165664	0.115264	0.72489		1097	-0.137877	-0.276969	0.0012137	0.0520293
Phospholipids in small HDL	1097	-0.142838	-0.278792	-0.0068842	0.0394923		1097	-0.0170392	-0.153001	0.118923	0.805804		1097	-0.12806	-0.257906	0.0017851	0.0532282
Total cholesterol in small HDL	1097	-0.143136	-0.286786	0.0005128	0.050822		1097	-0.020218	-0.159716	0.11928	0.776171		1097	-0.130135	-0.269957	0.009688	0.0680949
Cholesterol esters in small HDL	1097	-0.132826	-0.275195	0.0095439	0.0674318		1097	-0.0194889	-0.158103	0.119125	0.782695		1097	-0.120467	-0.258803	0.0178694	0.0877937
Free cholesterol in small HDL	1097	-0.173797	-0.3151	-0.0324951	0.0159699		1097	-0.0205496	-0.157777	0.116678	0.768944		1097	-0.15958	-0.296418	-0.0227417	0.0223145
Triglycerides in small HDL	1097	-0.0107023	-0.130714	0.10931	0.86113		1097	-0.0824409	-0.204859	0.0399771	0.186651		1097	0.0431993	-0.0667656	0.153164	0.440979
Phospholipids to total lipds ratio in chylomicrons and extremely large VLDL	1097	-0.0387573	-0.168203	0.090688	0.556998		1097	-0.0385932	-0.160603	0.0834166	0.534959		1097	-0.0231798	-0.13373	0.0873704	0.680848
Total cholesterol to total lipids ratio in chylomicrons and extremely large VLDL	1097	-0.0309089	-0.159855	0.0980374	0.63821		1097	-0.0112951	-0.141755	0.119164	0.865134		1097	-0.0264101	-0.144049	0.0912286	0.659658
Cholesterol esters to total lipids ratio in chylomicrons and extremely large VLDL	1097	-0.0248049	-0.151472	0.101862	0.700873		1097	-0.0146002	-0.143032	0.113832	0.823533		1097	-0.0180031	-0.133989	0.0979828	0.760758
Free cholesterol to total lipids ratio in chylomicrons and extremely large VLDL	1097	-0.0415858	-0.174016	0.0908442	0.537921		1097	-0.0040625	-0.137151	0.129026	0.952251		1097	-0.0419533	-0.162467	0.0785609	0.494713
Triglycerides to total lipids ratio in chylomicrons and extremely large VLDL	1097	0.0485624	-0.0835228	0.180648	0.470816		1097	0.0322156	-0.0968143	0.161246	0.624303		1097	0.0356073	-0.0836776	0.154892	0.558189
Phospholipids to total lipds ratio in very large VLDL	1097	0.0049742	-0.108764	0.118713	0.931632		1097	0.010578	-0.114413	0.135569	0.868143		1097	-0.0009991	-0.110176	0.108178	0.985678
Total cholesterol to total lipids ratio in very large VLDL	1097	-0.0026741	-0.12911	0.123761	0.966906		1097	0.0223171	-0.101866	0.1465	0.724441		1097	-0.0157837	-0.132153	0.100586	0.790185
Cholesterol esters to total lipids ratio in very large VLDL	1097	-0.0005077	-0.123266	0.12225	0.993526		1097	0.0247336	-0.096819	0.146286	0.68978		1097	-0.0134792	-0.126884	0.0999252	0.815635
Free cholesterol to total lipids ratio in very large VLDL	1097	-0.005844	-0.134738	0.12305	0.929128		1097	0.0178629	-0.108179	0.143905	0.781003		1097	-0.0186672	-0.137705	0.10037	0.758369
Triglycerides to total lipids ratio in very large VLDL	1097	-0.001109	-0.125748	0.12353	0.986074		1097	-0.0256649	-0.152838	0.101509	0.692196		1097	0.0138057	-0.104145	0.131756	0.818397
Phospholipids to total lipds ratio in large VLDL	1097	-0.103039	-0.234395	0.028317	0.124057		1097	-0.0214348	-0.136891	0.0940214	0.71572		1097	-0.0855323	-0.202123	0.0310585	0.15031
Total cholesterol to total lipids ratio in large VLDL	1097	-0.0392397	-0.168875	0.0903959	0.552684		1097	-0.0210323	-0.1516	0.109535	0.75201		1097	-0.0266807	-0.155263	0.101901	0.683981
Cholesterol esters to total lipids ratio in large VLDL	1097	-0.011148	-0.138664	0.116368	0.863831		1097	0.0068877	-0.117922	0.131698	0.913792		1097	-0.0139943	-0.141217	0.113229	0.829158
Free cholesterol to total lipids ratio in large VLDL	1097	-0.0792731	-0.208696	0.0501496	0.229686		1097	-0.064023	-0.196877	0.0688312	0.344579		1097	-0.0431615	-0.170286	0.0839626	0.505428
Triglycerides to total lipids ratio in large VLDL	1097	0.100706	-0.0235892	0.225	0.112179		1097	0.0336206	-0.0952018	0.162443	0.608692		1097	0.0777913	-0.043777	0.19936	0.209539
Phospholipids to total lipds ratio in medium VLDL	1097	-0.173768	-0.358395	0.0108592	0.0650563		1097	0.008779	-0.148124	0.165682	0.912599		1097	-0.178759	-0.38721	0.0296923	0.0927289
Total cholesterol to total lipids ratio in medium VLDL	1097	0.0127983	-0.103078	0.128675	0.82847		1097	0.0787782	-0.116333	0.27389	0.428395		1097	-0.0273027	-0.175111	0.120505	0.717091
Cholesterol esters to total lipids ratio in medium VLDL	1097	0.0153172	-0.101217	0.131851	0.796529		1097	0.0682691	-0.0928929	0.229431	0.406056		1097	-0.0212942	-0.152044	0.109455	0.749362
Free cholesterol to total lipids ratio in medium VLDL	1097	-0.0025907	-0.119964	0.114782	0.965463		1097	0.0482345	-0.156723	0.253192	0.644339		1097	-0.0227386	-0.169845	0.124368	0.761723
Triglycerides to total lipids ratio in medium VLDL	1097	0.0728615	-0.0448592	0.190582	0.224842		1097	-0.0749036	-0.240575	0.0907678	0.375204		1097	0.111255	-0.0257983	0.248308	0.111495
Phospholipids to total lipds ratio in small VLDL	1097	-0.20476	-0.326675	-0.082844	0.0010143		1097	0.026418	-0.123529	0.176365	0.729638		1097	-0.224759	-0.357193	-0.0923243	0.0008976
Total cholesterol to total lipids ratio in small VLDL	1097	0.045195	-0.07134	0.16173	0.446841		1097	-0.0099445	-0.132924	0.113035	0.873961		1097	0.0556745	-0.0533654	0.164714	0.316639
Cholesterol esters to total lipids ratio in small VLDL	1097	0.0984404	-0.0176065	0.214487	0.09631		1097	-0.0036295	-0.12838	0.121121	0.954486		1097	0.105857	-0.0033641	0.215077	0.0574729
Free cholesterol to total lipids ratio in small VLDL	1097	-0.231397	-0.365578	-0.0972156	0.0007406		1097	-0.0304418	-0.171902	0.111018	0.672926		1097	-0.215419	-0.353232	-0.0776058	0.0022151
Triglycerides to total lipids ratio in small VLDL	1097	0.0614549	-0.0576589	0.180569	0.311601		1097	-0.0037585	-0.13362	0.126103	0.954723		1097	0.0612649	-0.0553838	0.177914	0.302986
Phospholipids to total lipds ratio in very small VLDL	1097	-0.0921607	-0.20356	0.0192382	0.104817		1097	0.0336662	-0.0987812	0.166114	0.618056		1097	-0.108423	-0.222397	0.0055514	0.0622297
Total cholesterol to total lipids ratio in very small VLDL	1097	0.131407	0.0213619	0.241452	0.019307		1097	0.0266321	-0.098368	0.151632	0.675994		1097	0.11069	0.0057551	0.215625	0.0387106
Cholesterol esters to total lipids ratio in very small VLDL	1097	0.149935	0.0356304	0.264239	0.010191		1097	-0.0048918	-0.140775	0.130992	0.943699		1097	0.145948	0.0308524	0.261044	0.0129911
Free cholesterol to total lipids ratio in very small VLDL	1097	-0.0299007	-0.156564	0.0967624	0.643317		1097	0.0902843	-0.0461444	0.226713	0.194394		1097	-0.0788083	-0.20729	0.0496734	0.229027
Triglycerides to total lipids ratio in very small VLDL	1097	-0.0505084	-0.160606	0.059589	0.368236		1097	-0.0404637	-0.159133	0.0782057	0.503605		1097	-0.0247622	-0.126701	0.077177	0.633722
Phospholipids to total lipds ratio in IDL	1097	0.0104717	-0.0946375	0.115581	0.845051		1097	0.0376422	-0.071462	0.146746	0.498572		1097	-0.0138636	-0.113323	0.0855955	0.784518
Total cholesterol to total lipids ratio in IDL	1097	0.0532945	-0.0556087	0.162198	0.337155		1097	0.0502634	-0.0626346	0.163161	0.382545		1097	0.0254573	-0.0746732	0.125588	0.617979
Cholesterol esters to total lipids ratio in IDL	1097	0.0716575	-0.0339596	0.177275	0.183386		1097	0.0366289	-0.0762496	0.149507	0.524444		1097	0.0547187	-0.0446514	0.154089	0.280173
Free cholesterol to total lipids ratio in IDL	1097	-0.0287393	-0.126768	0.0692892	0.565241		1097	0.048411	-0.0551179	0.15194	0.359075		1097	-0.0637164	-0.158642	0.0312091	0.188101
Triglycerides to total lipids ratio in IDL	1097	-0.0720411	-0.183164	0.0390821	0.203624		1097	-0.0820458	-0.199461	0.0353691	0.17063		1097	-0.0248246	-0.127051	0.0774015	0.633822
Phospholipids to total lipds ratio in large LDL	1097	0.0075598	-0.10082	0.11594	0.891162		1097	0.0211591	-0.0878996	0.130218	0.703509		1097	-0.0064305	-0.107216	0.0943548	0.900394
Total cholesterol to total lipids ratio in large LDL	1097	0.0671889	-0.043105	0.177483	0.232229		1097	0.0390762	-0.0741245	0.152277	0.498345		1097	0.0466431	-0.0551448	0.148431	0.368781
Cholesterol esters to total lipids ratio in large LDL	1097	0.0536947	-0.0585144	0.165904	0.347973		1097	0.0169192	-0.0985888	0.132427	0.773854		1097	0.0487091	-0.0558624	0.153281	0.360938
Free cholesterol to total lipids ratio in large LDL	1097	0.0160225	-0.0870138	0.119059	0.760333		1097	0.0572513	-0.0476846	0.162187	0.284624		1097	-0.0270825	-0.124752	0.0705865	0.586496
Triglycerides to total lipids ratio in large LDL	1097	-0.133473	-0.250178	-0.0167681	0.0250285		1097	-0.0968228	-0.217919	0.0242733	0.116975		1097	-0.0792842	-0.186219	0.0276508	0.146017
Phospholipids to total lipds ratio in medium LDL	1097	-0.0168638	-0.130059	0.0963315	0.770098		1097	-0.0061924	-0.123217	0.110832	0.917326		1097	-0.0144074	-0.119569	0.0907539	0.788119
Total cholesterol to total lipids ratio in medium LDL	1097	0.0709547	-0.0450543	0.186964	0.230357		1097	0.038882	-0.0830495	0.160813	0.531644		1097	0.0499239	-0.0572043	0.157052	0.360709
Cholesterol esters to total lipids ratio in medium LDL	1097	0.0598236	-0.0541532	0.1738	0.303294		1097	0.0174369	-0.103264	0.138138	0.776879		1097	0.05274	-0.0525088	0.157989	0.325713
Free cholesterol to total lipids ratio in medium LDL	1097	-0.0233506	-0.13358	0.0868787	0.677744		1097	0.0375006	-0.078559	0.15356	0.526214		1097	-0.0513284	-0.152859	0.0502025	0.321441
Triglycerides to total lipids ratio in medium LDL	1097	-0.156783	-0.275981	-0.0375844	0.0099864		1097	-0.0918137	-0.218433	0.0348053	0.155084		1097	-0.105414	-0.21488	0.0040509	0.0590859
Phospholipids to total lipds ratio in small LDL	1097	-0.0406326	-0.151257	0.0699915	0.471247		1097	-0.0051245	-0.122634	0.112385	0.931825		1097	-0.0398426	-0.1431	0.0634152	0.44915
Total cholesterol to total lipids ratio in small LDL	1097	0.0687698	-0.0446535	0.182193	0.234435		1097	0.0326662	-0.0884036	0.153736	0.596627		1097	0.0502431	-0.0549408	0.155427	0.348834
Cholesterol esters to total lipids ratio in small LDL	1097	0.0654842	-0.0467816	0.17775	0.252662		1097	0.0157595	-0.105496	0.137015	0.798755		1097	0.0582231	-0.0460645	0.162511	0.273559
Free cholesterol to total lipids ratio in small LDL	1097	-0.0341947	-0.141417	0.0730276	0.531605		1097	0.0529416	-0.0620912	0.167974	0.366704		1097	-0.0717866	-0.171904	0.0283306	0.159739
Triglycerides to total lipids ratio in small LDL	1097	-0.118408	-0.240776	0.0039591	0.057873		1097	-0.0924397	-0.219835	0.0349553	0.154801		1097	-0.0605831	-0.172582	0.0514162	0.288756
Phospholipids to total lipds ratio in very large HDL	1097	0.0065188	-0.0999163	0.112954	0.904366		1097	0.112431	-0.0126161	0.237478	0.0779816		1097	-0.0507775	-0.156872	0.0553172	0.34789
Total cholesterol to total lipids ratio in very large HDL	1097	-0.0181955	-0.13676	0.100369	0.76338		1097	-0.116363	-0.251488	0.0187611	0.0913686		1097	0.0384902	-0.0791087	0.156089	0.52087
Cholesterol esters to total lipids ratio in very large HDL	1097	-0.0019323	-0.121693	0.117829	0.97475		1097	-0.108681	-0.236356	0.0189941	0.0951592		1097	0.0528978	-0.0648863	0.170682	0.378395
Free cholesterol to total lipids ratio in very large HDL	1097	-0.0602252	-0.160306	0.0398553	0.237957		1097	0.0054938	-0.102498	0.113486	0.920506		1097	-0.0705636	-0.168592	0.0274647	0.158115
Triglycerides to total lipids ratio in very large HDL	1097	0.0221257	-0.0498999	0.0941513	0.546796		1097	-0.0290454	-0.0949717	0.0368809	0.38752		1097	0.0423473	-0.0308029	0.115498	0.256246
Phospholipids to total lipds ratio in large HDL	1097	-0.006196	-0.11029	0.0978985	0.907046		1097	0.0006642	-0.110103	0.111432	0.990614		1097	0.0016052	-0.0982761	0.101486	0.97485
Total cholesterol to total lipids ratio in large HDL	1097	-0.0082315	-0.105049	0.0885857	0.867539		1097	-0.0031518	-0.108429	0.102126	0.953167		1097	-0.0160278	-0.10967	0.077614	0.737054
Cholesterol esters to total lipids ratio in large HDL	1097	0.018776	-0.0797831	0.117335	0.708627		1097	-0.0050553	-0.110997	0.100887	0.92542		1097	0.0131564	-0.0809608	0.107274	0.783919
Free cholesterol to total lipids ratio in large HDL	1097	-0.0612141	-0.154854	0.0324258	0.199873		1097	0.0012077	-0.101621	0.104036	0.981618		1097	-0.0723813	-0.165462	0.0206998	0.127351
Triglycerides to total lipids ratio in large HDL	1097	0.0183797	-0.0199729	0.0567323	0.347261		1097	0.0034737	-0.0475623	0.0545097	0.893783		1097	0.0193644	-0.0171058	0.0558347	0.29772
Phospholipids to total lipds ratio in medium HDL	1097	-0.0911385	-0.19914	0.0168632	0.0980544		1097	-0.115551	-0.227325	-0.003776	0.0427593		1097	-0.0263569	-0.129525	0.0768108	0.616273
Total cholesterol to total lipids ratio in medium HDL	1097	-0.0096082	-0.11402	0.0948038	0.856746		1097	0.0809715	-0.0288748	0.190818	0.148362		1097	-0.0611988	-0.16059	0.0381921	0.227244
Cholesterol esters to total lipids ratio in medium HDL	1097	0.0442734	-0.0633079	0.151855	0.419559		1097	0.10198	-0.0079949	0.211954	0.0691094		1097	-0.0190117	-0.119935	0.0819114	0.711733
Free cholesterol to total lipids ratio in medium HDL	1097	-0.145651	-0.249135	-0.0421667	0.0058477		1097	-0.0103237	-0.117616	0.0969684	0.850286		1097	-0.1436	-0.242033	-0.0451678	0.0042836
Triglycerides to total lipids ratio in medium HDL	1097	0.0760429	-0.0255617	0.177648	0.142255		1097	-0.0441401	-0.15288	0.0645999	0.425925		1097	0.110144	0.011881	0.208406	0.02806
Phospholipids to total lipds ratio in small HDL	1097	0.0751043	-0.0454201	0.195629	0.221706		1097	0.0280596	-0.0972796	0.153399	0.660556		1097	0.0598728	-0.0548923	0.174638	0.306228
Total cholesterol to total lipids ratio in small HDL	1097	-0.0779115	-0.198192	0.0423689	0.204007		1097	-0.006869	-0.131241	0.117503	0.913724		1097	-0.0759556	-0.190821	0.0389098	0.194739
Cholesterol esters to total lipids ratio in small HDL	1097	-0.0666852	-0.185385	0.0520145	0.270562		1097	-0.0096125	-0.133049	0.113824	0.878585		1097	-0.0624694	-0.17541	0.0504714	0.278031
Free cholesterol to total lipids ratio in small HDL	1097	-0.0531875	-0.157134	0.0507591	0.315604		1097	0.0316949	-0.0845373	0.147927	0.592723		1097	-0.0764774	-0.177773	0.024818	0.138787
Triglycerides to total lipids ratio in small HDL	1097	0.0490793	-0.063073	0.161232	0.390716		1097	-0.0652469	-0.182808	0.0523139	0.276393		1097	0.0911693	-0.0144941	0.196833	0.0907426
Mean diameter for VLDL particles	1097	0.0804759	-0.0270321	0.187984	0.142181		1097	-0.0243268	-0.139583	0.0909294	0.678849		1097	0.103116	-0.0013627	0.207594	0.0530585
Mean diameter for LDL particles	1097	0.0794275	-0.0555636	0.214419	0.248545		1097	-0.0244028	-0.16629	0.117485	0.735832		1097	0.0919489	-0.0413636	0.225262	0.176227
Mean diameter for HDL particles	1097	-0.106811	-0.215914	0.0022914	0.0550006		1097	-0.0340191	-0.148256	0.0802179	0.559129		1097	-0.0956795	-0.19986	0.0085013	0.0718167
Serum total cholesterol	1097	-0.0980967	-0.220638	0.0244444	0.116534		1097	-0.0763382	-0.194228	0.0415512	0.204153		1097	-0.0538943	-0.166646	0.0588578	0.348511
Total cholesterol in VLDL	1097	0.0419158	-0.0665302	0.150362	0.448377		1097	-0.0690787	-0.18113	0.0429725	0.226676		1097	0.0902214	-0.0127345	0.193177	0.0858165
Remnant cholesterol (non-HDL, non-LDL -cholesterol)	1097	0.0200093	-0.0933956	0.133414	0.729256		1097	-0.073194	-0.187782	0.0413944	0.210353		1097	0.0680393	-0.0375923	0.173671	0.206552
Total cholesterol in LDL	1097	-0.0279087	-0.147374	0.0915564	0.646768		1097	-0.0533659	-0.171008	0.0642759	0.373613		1097	0.0041079	-0.105969	0.114185	0.941641
Total cholesterol in HDL	1097	-0.215527	-0.331227	-0.0998274	0.0002694		1097	-0.0503168	-0.167555	0.0669214	0.399903		1097	-0.192768	-0.304357	-0.0811791	0.0007252
Total cholesterol in HDL2	1097	-0.210107	-0.324024	-0.0961906	0.0003094		1097	-0.047622	-0.163811	0.0685671	0.421446		1097	-0.188938	-0.298702	-0.0791728	0.0007576
Total cholesterol in HDL3	1097	-0.22829	-0.363357	-0.0932235	0.0009419		1097	-0.0658375	-0.196414	0.0647385	0.32272		1097	-0.195216	-0.324705	-0.0657269	0.0031624
Esterified cholesterol	1096	-0.0848362	-0.206687	0.0370144	0.172187		1096	-0.0701678	-0.188468	0.0481326	0.244754		1096	-0.045143	-0.15739	0.0671043	0.43021
Free cholesterol	1096	-0.134768	-0.267107	-0.0024288	0.0459481		1096	-0.0823822	-0.199703	0.0349381	0.168542		1096	-0.0846419	-0.20434	0.0350558	0.165575
Serum total triglycerides	1097	0.0056986	-0.101182	0.112579	0.916699		1097	-0.0724787	-0.185058	0.0401006	0.206776		1097	0.05513	-0.0466639	0.156924	0.288167
Triglycerides in VLDL	1097	0.0361669	-0.0638175	0.136151	0.478006		1097	-0.0496357	-0.1581	0.0588287	0.369425		1097	0.0733405	-0.0242154	0.170897	0.140474
Triglycerides in LDL	1097	-0.16019	-0.287861	-0.0325193	0.0139735		1097	-0.143074	-0.265791	-0.0203569	0.02235		1097	-0.0788348	-0.191903	0.0342329	0.17157
Triglycerides in HDL	1097	-0.075039	-0.204558	0.0544798	0.25587		1097	-0.104937	-0.229491	0.0196162	0.098594		1097	-0.0120392	-0.130624	0.106546	0.84214
Total phosphoglycerides	1096	-0.182325	-0.317364	-0.0472861	0.0081847		1096	-0.106031	-0.227015	0.0149529	0.0857827		1096	-0.11941	-0.23938	0.00056	0.0510771
Ratio of triglycerides to phosphoglycerides	1093	0.0001915	-0.095323	0.0957059	0.996862		1093	-0.0534304	-0.163901	0.05704	0.342821		1093	0.0372661	-0.0579262	0.132458	0.442565
Phosphatidylcholine and other cholines	1096	-0.15076	-0.278275	-0.0232446	0.0205348		1096	-0.105061	-0.222929	0.0128064	0.08058		1096	-0.0885812	-0.203285	0.0261228	0.12999
Total cholines	1096	-0.172138	-0.304986	-0.03929	0.0111455		1096	-0.10059	-0.220512	0.0193319	0.100085		1096	-0.11203	-0.231287	0.0072279	0.0655678
Apolipoprotein A-I	1097	-0.205447	-0.327646	-0.0832476	0.0010023		1097	-0.0591364	-0.179545	0.0612718	0.335422		1097	-0.174974	-0.291498	-0.0584491	0.0032839
Apolipoprotein B	1097	0.0097174	-0.102833	0.122268	0.865507		1097	-0.0655157	-0.180162	0.0491308	0.262413		1097	0.0535217	-0.0521762	0.15922	0.320656
Ratio of apolipoprotein B to apolipoprotein A-I	1097	0.106137	0.0057534	0.206522	0.0382579		1097	-0.0255624	-0.135448	0.0843231	0.648157		1097	0.129969	0.0318664	0.228071	0.0094623
Total fatty acids	1096	-0.132846	-0.259114	-0.0065776	0.0392204		1096	-0.111549	-0.23173	0.0086315	0.0688473		1096	-0.0650626	-0.180173	0.0500482	0.267657
Estimated degree of unsaturation	1096	-0.0160205	-0.145898	0.113856	0.8088		1096	-0.0090846	-0.124916	0.106747	0.877725		1096	-0.0126159	-0.133953	0.108721	0.838381
22:6, docosahexaenoic acid	1096	-0.254358	-0.384305	-0.124412	0.0001298		1096	-0.102943	-0.230387	0.0245017	0.113276		1096	-0.195386	-0.32051	-0.0702621	0.0022381
18:2, linoleic acid	1096	-0.155049	-0.279207	-0.0308919	0.0144284		1096	-0.118032	-0.244776	0.0087111	0.0679302		1096	-0.0872877	-0.204865	0.0302895	0.145495
Omega-3 fatty acids	1096	-0.149981	-0.27172	-0.0282422	0.0157979		1096	-0.0650329	-0.193768	0.0637026	0.321802		1096	-0.110661	-0.232515	0.011193	0.0750421
Omega-6 fatty acids	1096	-0.156922	-0.285058	-0.0287872	0.0164293		1096	-0.121241	-0.245315	0.0028332	0.0554562		1096	-0.0855389	-0.204628	0.0335507	0.159014
Polyunsaturated fatty acids	1096	-0.159557	-0.287211	-0.0319031	0.0143421		1096	-0.117306	-0.242212	0.0076002	0.0656365		1096	-0.0903692	-0.210018	0.0292795	0.138633
Monounsaturated fatty acids; 16:1, 18:1	1096	-0.110759	-0.23198	0.0104621	0.0732822		1096	-0.116893	-0.234296	0.0005104	0.0510026		1096	-0.0387154	-0.147512	0.0700807	0.485178
Saturated fatty acids	1096	-0.110531	-0.237114	0.0160522	0.0869377		1096	-0.0867769	-0.204895	0.0313408	0.149725		1096	-0.0567553	-0.170533	0.0570221	0.327909
Ratio of 22:6 docosahexaenoic acid to total fatty acids	1096	-0.174102	-0.282838	-0.0653658	0.0017253		1096	-0.0063979	-0.122444	0.109648	0.913874		1096	-0.174816	-0.282909	-0.0667237	0.0015492
Ratio of 18:2 linoleic acid to total fatty acids	1096	-0.0588236	-0.167308	0.0496608	0.287592		1096	-0.0156675	-0.135964	0.104628	0.798344		1096	-0.0581143	-0.156908	0.0406795	0.248667
Ratio of omega-3 fatty acids to total fatty acids	1096	-0.0559756	-0.171347	0.0593955	0.341312		1096	0.0558011	-0.0650953	0.176698	0.36532		1096	-0.0892726	-0.207885	0.02934	0.140021
Ratio of omega-6 fatty acids to total fatty acids	1096	-0.0453795	-0.152277	0.0615181	0.40505		1096	-0.0063094	-0.120574	0.107955	0.913741		1096	-0.0492353	-0.146818	0.0483476	0.322394
Ratio of polyunsaturated fatty acids to total fatty acids	1096	-0.0539112	-0.162387	0.0545644	0.329694		1096	0.0074966	-0.107626	0.122619	0.898352		1096	-0.0651935	-0.166975	0.036588	0.209094
Ratio of monounsaturated fatty acids to total fatty acids	1096	-0.0178042	-0.127117	0.0915084	0.749345		1096	-0.0720991	-0.189068	0.04487	0.226749		1096	0.0307712	-0.0686472	0.13019	0.543771
Ratio of saturated fatty acids to total fatty acids	1096	0.109815	-0.004123	0.223752	0.0588705		1096	0.107191	-0.0070598	0.221442	0.0659079		1096	0.0468945	-0.0525347	0.146324	0.354951
Insulin	1096	0.0194686	-0.156771	0.195708	0.828442		1096	-0.0213262	-0.212548	0.169895	0.826822		1096	0.0307304	-0.10027	0.161731	0.645403
Glucose	1096	0.0796479	-0.0474207	0.206716	0.219002		1096	-0.0213362	-0.139788	0.097116	0.723833		1096	0.0975194	-0.0078	0.202839	0.0695181
Lactate	1097	-0.0201628	-0.142045	0.10172	0.745551		1097	-0.0352989	-0.173058	0.10246	0.615225		1097	-0.0120491	-0.133222	0.109124	0.845343
Citrate	1097	-0.0697436	-0.183412	0.0439248	0.228884		1097	0.0578166	-0.058424	0.174057	0.329307		1097	-0.0955554	-0.201153	0.0100418	0.0760854
Alanine	1097	0.185551	0.0701938	0.300907	0.0016429		1097	0.0153589	-0.114579	0.145297	0.816636		1097	0.173508	0.0613025	0.285714	0.0024695
Glutamine	1083	0.0063105	-0.0956394	0.10826	0.903354		1083	-0.0355728	-0.139927	0.0687814	0.503717		1083	0.0267911	-0.0734743	0.127057	0.600179
Histidine	1097	0.132838	0.0174169	0.248258	0.0241287		1097	0.114795	-0.0035535	0.233144	0.0572739		1097	0.0695313	-0.0444166	0.183479	0.231447
Isoleucine	1096	0.0886685	0.0019557	0.175381	0.0450606		1096	-0.0346842	-0.128703	0.0593346	0.469312		1096	0.124373	0.0400625	0.208684	0.0038735
Leucine	1097	0.0738705	-0.0122301	0.159971	0.0925776		1097	0.0011488	-0.0881413	0.0904389	0.979864		1097	0.0891913	0.0082486	0.170134	0.0308279
Valine	1096	0.119575	0.0239461	0.215203	0.0143041		1096	0.0118041	-0.0925358	0.116144	0.82437		1096	0.128301	0.039593	0.217009	0.0046255
Phenylalanine	1096	0.235873	0.124195	0.34755	3.67e-05		1096	0.112103	-0.0063192	0.230525	0.063518		1096	0.175448	0.0679433	0.282953	0.0014033
Tyrosine	1097	0.170164	0.0625241	0.277804	0.0019725		1097	0.0198451	-0.0950117	0.134702	0.734658		1097	0.16667	0.0678597	0.26548	0.0009647
Acetate	1097	0.025636	-0.0337902	0.0850622	0.397485		1097	0.0110128	-0.0417643	0.06379	0.6823		1097	0.0171038	-0.0322884	0.066496	0.496988
Acetoacetate	1097	-0.193261	-0.304026	-0.0824954	0.0006412		1097	-0.0679435	-0.181381	0.045494	0.240159		1097	-0.148776	-0.262761	-0.0347918	0.0105695
3-hydroxybutyrate	1096	-0.168	-0.277094	-0.058907	0.0025729		1096	-0.0324955	-0.158378	0.0933868	0.612599		1096	-0.154021	-0.274518	-0.0335247	0.0122846
Creatinine	1097	0.0806387	-0.0028239	0.164101	0.0582568		1097	0.144373	0.0618723	0.226874	0.0006179		1097	0.0276544	-0.0530427	0.108352	0.501461
Albumin (signal area)	1097	-0.0084709	-0.119746	0.102804	0.881289		1097	0.0293504	-0.0839669	0.142668	0.611403		1097	-0.0242534	-0.129944	0.0814372	0.652608
Glycoprotein acetyls, mainly a1-acid glycoprotein	1097	-0.081891	-0.198976	0.0351941	0.170236		1097	-0.186007	-0.297101	-0.0749124	0.0010515		1097	0.0281032	-0.0785668	0.134773	0.605298
C-reactive protein	1030	-0.0754385	-0.199064	0.0481867	0.231417		1030	-0.142093	-0.315748	0.0315618	0.108661		1030	0.0037671	-0.0790641	0.0865983	0.928906
Complete case sample
Standardized outcome at age 25y	N	Beta	LCL	UCL	P-value		N	Beta	LCL	UCL	P-value		N	Beta	LCL	UCL	P-value
Systolic blood pressure	470	0.304142	0.152452	0.455831	9.41e-05		470	0.2262	0.0540979	0.398303	0.0101072		470	0.216214	0.0596508	0.372777	0.0069008
Diastolic blood pressure	470	0.234349	0.0623306	0.406367	0.0076897		470	0.110073	-0.0763763	0.296523	0.246588		470	0.196112	0.0167026	0.375522	0.032229
Concentration of chylomicrons and extremely large VLDL particles	470	0.0702813	-0.0601494	0.200712	0.290203		470	-0.107007	-0.277149	0.0631346	0.217112		470	0.152905	0.0153001	0.290509	0.0294939
Total lipids in chylomicrons and extremely large VLDL	470	0.0688521	-0.0615789	0.199283	0.300112		470	-0.108028	-0.277982	0.0619255	0.21226		470	0.15206	0.0146307	0.28949	0.0301888
Phospholipids in chylomicrons and extremely large VLDL	470	0.0619824	-0.0677823	0.191747	0.348401		470	-0.10838	-0.275902	0.0591419	0.204239		470	0.144435	0.0089955	0.279875	0.0366592
Total cholesterol in chylomicrons and extremely large VLDL	470	0.0606945	-0.0723613	0.19375	0.3705		470	-0.123697	-0.293369	0.0459747	0.152633		470	0.153011	0.0141416	0.29188	0.0308821
Cholesterol esters in chylomicrons and extremely large VLDL	470	0.0817581	-0.0556988	0.219215	0.24307		470	-0.132831	-0.305562	0.0398995	0.131422		470	0.179301	0.0337673	0.324835	0.0158605
Free cholesterol in chylomicrons and extremely large VLDL	470	0.0348161	-0.0958655	0.165498	0.600842		470	-0.110094	-0.277176	0.0569886	0.196014		470	0.118818	-0.0156772	0.253314	0.0832198
Triglycerides in chylomicrons and extremely large VLDL	470	0.0717124	-0.0587281	0.202153	0.28054		470	-0.103547	-0.274118	0.0670239	0.233498		470	0.152376	0.0144272	0.290325	0.0304683
Concentration of very large VLDL particles	470	0.0343037	-0.101604	0.170211	0.620124		470	-0.109915	-0.283557	0.0637276	0.21416		470	0.121562	-0.0179236	0.261047	0.0874561
Total lipids in very large VLDL	470	0.0345944	-0.100653	0.169842	0.615447		470	-0.111038	-0.284227	0.0621512	0.208335		470	0.122357	-0.0165579	0.261272	0.0841393
Phospholipids in very large VLDL	470	0.0391703	-0.0952237	0.173564	0.567089		470	-0.12004	-0.291329	0.0512486	0.169125		470	0.131299	-0.0060719	0.268671	0.0609758
Total cholesterol in very large VLDL	470	0.036692	-0.0934063	0.16679	0.579688		470	-0.121111	-0.290774	0.0485511	0.161353		470	0.129057	-0.0058314	0.263945	0.0607152
Cholesterol esters in very large VLDL	470	0.0395846	-0.0916129	0.170782	0.553527		470	-0.126048	-0.297229	0.0451331	0.148573		470	0.135768	-0.0007317	0.272267	0.0512356
Free cholesterol in very large VLDL	470	0.0331807	-0.0957922	0.162154	0.613401		470	-0.114915	-0.282807	0.0529767	0.179268		470	0.120759	-0.0124992	0.254018	0.0756027
Triglycerides in very large VLDL	470	0.0326115	-0.10502	0.170243	0.641696		470	-0.105291	-0.280174	0.0695919	0.237362		470	0.117484	-0.0235657	0.258533	0.102353
Concentration of large VLDL particles	470	0.0426172	-0.103169	0.188404	0.565936		470	-0.0992363	-0.281929	0.083456	0.286331		470	0.125764	-0.022149	0.273677	0.095427
Total lipids in large VLDL	470	0.0422336	-0.103178	0.187645	0.568442		470	-0.100972	-0.283219	0.0812755	0.276828		470	0.12637	-0.0211163	0.273856	0.0929026
Phospholipids in large VLDL	470	0.0413323	-0.105743	0.188408	0.581038		470	-0.10295	-0.285836	0.079936	0.26921		470	0.126763	-0.0218845	0.27541	0.0944523
Total cholesterol in large VLDL	470	0.0453075	-0.0974265	0.188042	0.533076		470	-0.116044	-0.295323	0.0632354	0.204017		470	0.138579	-0.0059977	0.283156	0.0602478
Cholesterol esters in large VLDL	470	0.063282	-0.0818396	0.208403	0.391934		470	-0.117461	-0.299975	0.0650534	0.206616		470	0.159359	0.0119266	0.306791	0.0341945
Free cholesterol in large VLDL	470	0.0271758	-0.113639	0.167991	0.704676		470	-0.113653	-0.289789	0.0624835	0.205432		470	0.116873	-0.0256052	0.25935	0.107653
Triglycerides in large VLDL	470	0.041197	-0.104969	0.187363	0.579931		470	-0.0944899	-0.277731	0.0887508	0.311427		470	0.121306	-0.0271924	0.269803	0.109116
Concentration of medium VLDL particles	470	0.0708196	-0.0794036	0.221043	0.354711		470	-0.105261	-0.291782	0.0812612	0.26801		470	0.159645	0.0086478	0.310642	0.0382931
Total lipids in medium VLDL	470	0.0715379	-0.0789687	0.222044	0.350764		470	-0.106749	-0.293188	0.0796911	0.261103		470	0.16121	0.009997	0.312422	0.0367127
Phospholipids in medium VLDL	470	0.0687884	-0.0827665	0.220343	0.372887		470	-0.111596	-0.298103	0.074912	0.24027		470	0.16141	0.0096916	0.313128	0.0371066
Total cholesterol in medium VLDL	470	0.0900137	-0.0639692	0.243997	0.251252		470	-0.120674	-0.306998	0.06565	0.203754		470	0.187719	0.0326744	0.342763	0.0177543
Cholesterol esters in medium VLDL	470	0.121914	-0.0356319	0.279459	0.129026		470	-0.130089	-0.317855	0.057677	0.174022		470	0.225676	0.0655367	0.385815	0.0058441
Free cholesterol in medium VLDL	470	0.0528231	-0.0988481	0.204494	0.494062		470	-0.10707	-0.292466	0.0783255	0.257002		470	0.141213	-0.0104498	0.292876	0.0679364
Triglycerides in medium VLDL	470	0.0632349	-0.0859832	0.212453	0.405402		470	-0.0975647	-0.284351	0.0892214	0.305213		470	0.147235	-0.0030509	0.297521	0.0548153
Concentration of small VLDL particles	470	0.0520667	-0.11255	0.216684	0.534543		470	-0.130924	-0.325591	0.0637421	0.186934		470	0.159202	-0.0009038	0.319307	0.0513019
Total lipids in small VLDL	470	0.0506318	-0.115182	0.216445	0.548758		470	-0.135237	-0.330271	0.0597975	0.173666		470	0.160369	-0.0007389	0.321477	0.0510556
Phospholipids in small VLDL	470	0.0033116	-0.170375	0.176998	0.970128		470	-0.13347	-0.330702	0.0637619	0.184228		470	0.111537	-0.0565566	0.279632	0.192901
Total cholesterol in small VLDL	470	0.0722018	-0.10017	0.244573	0.410852		470	-0.157569	-0.354771	0.0396334	0.117058		470	0.194194	0.0252044	0.363184	0.0243995
Cholesterol esters in small VLDL	470	0.108653	-0.065169	0.282476	0.219934		470	-0.159744	-0.357859	0.0383704	0.113759		470	0.231344	0.0584237	0.404263	0.0088486
Free cholesterol in small VLDL	470	0.0012429	-0.170688	0.173174	0.988672		470	-0.141685	-0.336738	0.053368	0.154125		470	0.112694	-0.0535088	0.278898	0.183365
Triglycerides in small VLDL	470	0.0495218	-0.110081	0.209125	0.542331		470	-0.106762	-0.299182	0.0856568	0.276131		470	0.140693	-0.015908	0.297295	0.0781409
Concentration of very small VLDL particles	470	0.0793185	-0.100791	0.259428	0.387253		470	-0.174455	-0.373063	0.0241536	0.0849921		470	0.20728	0.0280173	0.386542	0.0235314
Total lipids in very small VLDL	470	0.0843754	-0.0956185	0.264369	0.357431		470	-0.174374	-0.372987	0.0242393	0.0851437		470	0.211291	0.0314078	0.391174	0.0214284
Phospholipids in very small VLDL	470	0.0849375	-0.0923322	0.262207	0.3469		470	-0.169134	-0.365495	0.0272276	0.091199		470	0.203404	0.0215651	0.385243	0.0284335
Total cholesterol in very small VLDL	470	0.111181	-0.0692827	0.291644	0.226635		470	-0.170213	-0.36937	0.0289437	0.0937253		470	0.233528	0.0516714	0.415386	0.0119559
Cholesterol esters in very small VLDL	470	0.126292	-0.0536752	0.30626	0.168553		470	-0.170137	-0.36819	0.0279165	0.0920613		470	0.250157	0.0685022	0.431811	0.0070595
Free cholesterol in very small VLDL	470	0.0735497	-0.10787	0.254969	0.426041		470	-0.162272	-0.362215	0.0376707	0.111423		470	0.186791	0.004348	0.369234	0.044806
Triglycerides in very small VLDL	470	0.0020041	-0.182786	0.186794	0.983005		470	-0.138366	-0.34022	0.0634881	0.178625		470	0.112344	-0.0641334	0.288822	0.211572
Concentration of IDL particles	470	0.0461543	-0.132108	0.224416	0.611136		470	-0.160004	-0.358478	0.0384713	0.113829		470	0.152186	-0.0316801	0.336052	0.104518
Total lipids in IDL	470	0.0485369	-0.129923	0.226996	0.593272		470	-0.15757	-0.356731	0.0415923	0.120694		470	0.152201	-0.0319899	0.336393	0.105095
Phospholipids in IDL	470	0.060076	-0.117746	0.237898	0.507081		470	-0.155529	-0.355194	0.0441369	0.126521		470	0.161521	-0.0231356	0.346177	0.0863004
Total cholesterol in IDL	470	0.0547186	-0.12438	0.233818	0.54854		470	-0.151898	-0.35257	0.0487743	0.137566		470	0.153526	-0.0310375	0.338089	0.102803
Cholesterol esters in IDL	470	0.0565091	-0.121801	0.234819	0.533736		470	-0.154588	-0.354023	0.0448465	0.128385		470	0.158558	-0.0247585	0.341875	0.0898577
Free cholesterol in IDL	470	0.0489584	-0.131036	0.228953	0.593241		470	-0.141801	-0.345145	0.0615434	0.171236		470	0.137364	-0.0492933	0.324021	0.148808
Triglycerides in IDL	470	-0.0403285	-0.231124	0.150467	0.678063		470	-0.153501	-0.354988	0.0479856	0.135046		470	0.0709904	-0.122595	0.264576	0.471493
Concentration of large LDL particles	470	0.0109568	-0.169526	0.191439	0.905089		470	-0.155137	-0.355445	0.0451713	0.1287		470	0.111658	-0.0722206	0.295537	0.233363
Total lipids in large LDL	470	0.0146663	-0.166122	0.195454	0.873407		470	-0.153317	-0.354345	0.0477115	0.134627		470	0.113759	-0.0704208	0.297939	0.225456
Phospholipids in large LDL	470	0.0147169	-0.164273	0.193707	0.87171		470	-0.154066	-0.35344	0.0453077	0.129559		470	0.114685	-0.0687302	0.298101	0.21979
Total cholesterol in large LDL	470	0.024942	-0.156949	0.206833	0.787686		470	-0.148714	-0.351753	0.0543243	0.15073		470	0.120468	-0.0643504	0.305287	0.200868
Cholesterol esters in large LDL	470	0.0257981	-0.155709	0.207305	0.780132		470	-0.150233	-0.352783	0.0523173	0.145644		470	0.123219	-0.0609057	0.307344	0.18913
Free cholesterol in large LDL	470	0.0219014	-0.160337	0.20414	0.813405		470	-0.14193	-0.346236	0.0623751	0.172864		470	0.110129	-0.0762058	0.296464	0.246059
Triglycerides in large LDL	470	-0.0929706	-0.278506	0.0925648	0.325279		470	-0.147273	-0.341638	0.0470927	0.13717		470	0.0070941	-0.186221	0.200409	0.942542
Concentration of medium LDL particles	470	-0.0320323	-0.219337	0.155273	0.73697		470	-0.150447	-0.351751	0.0508564	0.142604		470	0.064774	-0.122391	0.251939	0.496785
Total lipids in medium LDL	470	-0.0318577	-0.219954	0.156239	0.739411		470	-0.148734	-0.350626	0.0531585	0.148377		470	0.0634934	-0.124264	0.25125	0.506671
Phospholipids in medium LDL	470	-0.0502295	-0.234515	0.134056	0.592476		470	-0.15596	-0.352588	0.0406682	0.119756		470	0.0521322	-0.133227	0.237491	0.580739
Total cholesterol in medium LDL	470	-0.0173899	-0.207142	0.172362	0.857156		470	-0.142204	-0.346858	0.0624506	0.17277		470	0.0729222	-0.116086	0.261931	0.448729
Cholesterol esters in medium LDL	470	-0.0018583	-0.190201	0.186484	0.984539		470	-0.142371	-0.347488	0.0627465	0.173236		470	0.0891669	-0.0988775	0.277211	0.351911
Free cholesterol in medium LDL	470	-0.0775262	-0.273416	0.118363	0.437126		470	-0.138657	-0.341298	0.0639833	0.1794		470	0.0082024	-0.185727	0.202132	0.933794
Triglycerides in medium LDL	470	-0.136849	-0.319237	0.0455398	0.141039		470	-0.138071	-0.327207	0.0510653	0.152089		470	-0.0455706	-0.236858	0.145717	0.639892
Concentration of small LDL particles	470	-0.0700711	-0.262599	0.122457	0.474836		470	-0.143628	-0.344274	0.0570175	0.160189		470	0.0205832	-0.170583	0.21175	0.83252
Total lipids in small LDL	470	-0.0704138	-0.264032	0.123204	0.475175		470	-0.141538	-0.342935	0.05986	0.167932		470	0.0184504	-0.173623	0.210524	0.850356
Phospholipids in small LDL	470	-0.125695	-0.321702	0.0703114	0.208234		470	-0.137896	-0.333514	0.0577227	0.16664		470	-0.0393594	-0.235122	0.156403	0.692947
Total cholesterol in small LDL	470	-0.0456712	-0.240037	0.148695	0.644472		470	-0.136633	-0.341712	0.0684449	0.191094		470	0.03938	-0.15322	0.23198	0.688014
Cholesterol esters in small LDL	470	-0.023363	-0.215203	0.168477	0.810962		470	-0.138562	-0.344394	0.0672709	0.18653		470	0.0637104	-0.127028	0.254449	0.511896
Free cholesterol in small LDL	470	-0.121299	-0.325164	0.0825674	0.242912		470	-0.125227	-0.327342	0.076888	0.224012		470	-0.0461955	-0.247048	0.154657	0.651496
Triglycerides in small LDL	470	-0.118168	-0.299429	0.063093	0.200798		470	-0.146962	-0.33238	0.0384549	0.120021		470	-0.0162538	-0.200591	0.168084	0.862511
Concentration of very large HDL particles	470	-0.0569867	-0.255588	0.141615	0.573113		470	-0.0346901	-0.24953	0.180149	0.75115		470	-0.0565838	-0.265704	0.152536	0.595169
Total lipids in very large HDL	470	-0.0580484	-0.256512	0.140415	0.56572		470	-0.0345287	-0.249454	0.180397	0.752366		470	-0.0579467	-0.266949	0.151056	0.586124
Phospholipids in very large HDL	470	-0.0594442	-0.255677	0.136789	0.55194		470	-0.0216775	-0.234356	0.191001	0.841335		470	-0.0662559	-0.270493	0.137981	0.524111
Total cholesterol in very large HDL	470	-0.0574827	-0.257174	0.142209	0.571887		470	-0.0448905	-0.263112	0.173331	0.686215		470	-0.0523156	-0.264245	0.159613	0.627832
Cholesterol esters in very large HDL	470	-0.050681	-0.251237	0.149875	0.619712		470	-0.0502022	-0.27047	0.170066	0.654446		470	-0.0421964	-0.255334	0.170941	0.697414
Free cholesterol in very large HDL	470	-0.0715023	-0.269115	0.126111	0.477415		470	-0.0321925	-0.24661	0.182225	0.768092		470	-0.0738329	-0.282392	0.134726	0.486974
Triglycerides in very large HDL	470	0.0002249	-0.193427	0.193877	0.99818		470	-0.102988	-0.308937	0.102961	0.326271		470	0.0568076	-0.157566	0.271181	0.602789
Concentration of large HDL particles	470	-0.127075	-0.313208	0.0590572	0.180378		470	0.0038356	-0.20524	0.212912	0.971257		470	-0.15169	-0.344439	0.0410591	0.122664
Total lipids in large HDL	470	-0.12648	-0.312726	0.0597657	0.182689		470	0.0049739	-0.204371	0.214319	0.96278		470	-0.15203	-0.344713	0.0406535	0.121704
Phospholipids in large HDL	470	-0.148932	-0.330717	0.0328531	0.108086		470	0.0004108	-0.205184	0.206005	0.996869		470	-0.170607	-0.359012	0.0177976	0.0758177
Total cholesterol in large HDL	470	-0.110983	-0.300178	0.0782121	0.249607		470	0.012203	-0.199754	0.22416	0.909969		470	-0.14209	-0.336935	0.0527555	0.152517
Cholesterol esters in large HDL	470	-0.107721	-0.297421	0.0819787	0.265045		470	0.0126521	-0.19942	0.224724	0.906721		470	-0.138911	-0.33415	0.0563282	0.162732
Free cholesterol in large HDL	470	-0.12141	-0.309117	0.0662967	0.204347		470	0.0106448	-0.200898	0.222188	0.921272		470	-0.152141	-0.345812	0.0415307	0.123339
Triglycerides in large HDL	470	-0.0342261	-0.240316	0.171864	0.744301		470	-0.0441627	-0.253836	0.165511	0.679131		470	-0.019049	-0.241807	0.203709	0.866619
Concentration of medium HDL particles	470	-0.218572	-0.404484	-0.0326608	0.0213096		470	0.009962	-0.188885	0.208809	0.921616		470	-0.234181	-0.431845	-0.0365167	0.0203359
Total lipids in medium HDL	470	-0.222297	-0.408663	-0.0359316	0.0195023		470	0.0118432	-0.186792	0.210479	0.906778		470	-0.239812	-0.437764	-0.0418597	0.017687
Phospholipids in medium HDL	470	-0.223368	-0.408989	-0.0377467	0.0184566		470	0.0008572	-0.19685	0.198564	0.993206		470	-0.232776	-0.429407	-0.0361463	0.0204321
Total cholesterol in medium HDL	470	-0.230678	-0.419815	-0.0415403	0.0169402		470	0.0277025	-0.170945	0.22635	0.784168		470	-0.261653	-0.461652	-0.0616544	0.0104563
Cholesterol esters in medium HDL	470	-0.229293	-0.418837	-0.0397488	0.0178511		470	0.0326051	-0.166467	0.231677	0.747703		470	-0.263672	-0.464126	-0.0632166	0.0100489
Free cholesterol in medium HDL	470	-0.233773	-0.421483	-0.0460631	0.0147636		470	0.009806	-0.187314	0.206926	0.922166		470	-0.252246	-0.450661	-0.0538316	0.0128278
Triglycerides in medium HDL	470	0.0930478	-0.112397	0.298492	0.373915		470	-0.0652598	-0.280001	0.149481	0.550661		470	0.157971	-0.0469466	0.362888	0.130478
Concentration of small HDL particles	470	-0.25431	-0.472136	-0.0364835	0.0222248		470	-0.017824	-0.216101	0.180453	0.859856		470	-0.240561	-0.464697	-0.0164248	0.0354725
Total lipids in small HDL	470	-0.257248	-0.475365	-0.0391307	0.0209046		470	-0.0174927	-0.214935	0.17995	0.861859		470	-0.24461	-0.468886	-0.020335	0.0326121
Phospholipids in small HDL	470	-0.218359	-0.426381	-0.0103368	0.039694		470	0.0381422	-0.171794	0.248079	0.721228		470	-0.238444	-0.45747	-0.0194177	0.0329331
Total cholesterol in small HDL	470	-0.251266	-0.472662	-0.0298704	0.0262115		470	-0.0479645	-0.244062	0.148133	0.630982		470	-0.223843	-0.447346	-0.0003388	0.0496552
Cholesterol esters in small HDL	470	-0.237966	-0.458949	-0.0169826	0.0348683		470	-0.0576558	-0.255491	0.14018	0.567121		470	-0.204345	-0.42679	0.0181001	0.0716915
Free cholesterol in small HDL	470	-0.277286	-0.491135	-0.0634381	0.0111557		470	0.0164651	-0.178653	0.211583	0.868364		470	-0.290388	-0.511786	-0.06899	0.0102628
Triglycerides in small HDL	470	0.0077576	-0.186298	0.201813	0.937417		470	-0.0877877	-0.30283	0.127255	0.422827		470	0.0900404	-0.0965085	0.276589	0.34337
Phospholipids to total lipds ratio in chylomicrons and extremely large VLDL	470	0.0907658	-0.105033	0.286564	0.362785		470	0.0495923	-0.197822	0.297006	0.693837		470	0.046216	-0.155693	0.248125	0.653056
Total cholesterol to total lipids ratio in chylomicrons and extremely large VLDL	470	-0.101782	-0.296891	0.0933262	0.305828		470	-0.0242125	-0.223218	0.174793	0.811138		470	-0.0887823	-0.283127	0.105562	0.369795
Cholesterol esters to total lipids ratio in chylomicrons and extremely large VLDL	470	-0.0981517	-0.294638	0.0983348	0.326786		470	-0.0348977	-0.233383	0.163587	0.729867		470	-0.078219	-0.273284	0.116846	0.431101
Free cholesterol to total lipids ratio in chylomicrons and extremely large VLDL	470	-0.103691	-0.295144	0.0877622	0.287742		470	-0.0013715	-0.201745	0.199002	0.989274		470	-0.105369	-0.2991	0.0883627	0.285709
Triglycerides to total lipids ratio in chylomicrons and extremely large VLDL	470	0.0307045	-0.161029	0.222438	0.753131		470	-0.0092411	-0.218748	0.200266	0.930963		470	0.0462695	-0.151158	0.243697	0.645335
Phospholipids to total lipds ratio in very large VLDL	470	0.0711453	-0.0976121	0.239903	0.407834		470	0.151801	-0.103653	0.407255	0.243506		470	-0.0245384	-0.224451	0.175374	0.809497
Total cholesterol to total lipids ratio in very large VLDL	470	-0.0985435	-0.277362	0.0802753	0.279398		470	0.0034738	-0.181953	0.1889	0.970649		470	-0.105211	-0.292697	0.0822753	0.270702
Cholesterol esters to total lipids ratio in very large VLDL	470	-0.104765	-0.280002	0.070473	0.240664		470	0.0070813	-0.173922	0.188085	0.938751		470	-0.111645	-0.295856	0.0725651	0.234257
Free cholesterol to total lipids ratio in very large VLDL	470	-0.0855924	-0.266168	0.0949834	0.352098		470	-0.0020703	-0.189584	0.185443	0.982699		470	-0.0916865	-0.281463	0.09809	0.342906
Triglycerides to total lipids ratio in very large VLDL	470	0.034399	-0.140199	0.208997	0.69881		470	-0.104506	-0.317708	0.108697	0.335923		470	0.103999	-0.0889822	0.29698	0.290142
Phospholipids to total lipds ratio in large VLDL	470	-0.0307825	-0.198514	0.136949	0.718529		470	0.074636	-0.103468	0.25274	0.410644		470	-0.0816552	-0.257055	0.093745	0.360751
Total cholesterol to total lipids ratio in large VLDL	470	-0.147919	-0.371065	0.0752266	0.193345		470	-0.0205571	-0.234894	0.193779	0.850584		470	-0.140979	-0.372532	0.0905748	0.232135
Cholesterol esters to total lipids ratio in large VLDL	470	-0.12352	-0.33411	0.0870707	0.24966		470	0.0043459	-0.19861	0.207302	0.966453		470	-0.129835	-0.347925	0.0882546	0.242644
Free cholesterol to total lipids ratio in large VLDL	470	-0.162414	-0.385304	0.0604757	0.152838		470	-0.0586081	-0.27598	0.158764	0.596474		470	-0.134498	-0.365808	0.0968113	0.253773
Triglycerides to total lipids ratio in large VLDL	470	0.16399	-0.0363623	0.364342	0.108416		470	-0.0247707	-0.233266	0.183725	0.815498		470	0.187825	-0.0276512	0.403301	0.0873937
Phospholipids to total lipds ratio in medium VLDL	470	-0.149188	-0.322897	0.0245215	0.0921407		470	0.138339	-0.133785	0.410463	0.318312		470	-0.259897	-0.477861	-0.0419334	0.0195446
Total cholesterol to total lipids ratio in medium VLDL	470	0.104085	-0.0817554	0.289925	0.271634		470	-0.0226978	-0.228741	0.183345	0.828708		470	0.112773	-0.0911131	0.316659	0.277625
Cholesterol esters to total lipids ratio in medium VLDL	470	0.111009	-0.0839264	0.305945	0.26369		470	-0.0154288	-0.238858	0.208	0.892115		470	0.111047	-0.104133	0.326227	0.311046
Free cholesterol to total lipids ratio in medium VLDL	470	0.0134414	-0.172211	0.199094	0.886922		470	-0.023482	-0.225066	0.178102	0.819036		470	0.0362456	-0.157028	0.229519	0.712643
Triglycerides to total lipids ratio in medium VLDL	470	-0.0208669	-0.200319	0.158585	0.819351		470	-0.0468213	-0.290328	0.196685	0.70571		470	0.0250997	-0.183699	0.233899	0.813359
Phospholipids to total lipds ratio in small VLDL	470	-0.247242	-0.440732	-0.0537527	0.0123789		470	0.107851	-0.105564	0.321267	0.321182		470	-0.338114	-0.540716	-0.135512	0.0011189
Total cholesterol to total lipids ratio in small VLDL	470	0.0548434	-0.138935	0.248622	0.578359		470	-0.121552	-0.339728	0.0966236	0.274159		470	0.135548	-0.0637296	0.334825	0.181987
Cholesterol esters to total lipids ratio in small VLDL	470	0.129426	-0.0643041	0.323155	0.189886		470	-0.124445	-0.344854	0.0959636	0.267776		470	0.21598	0.0146338	0.417327	0.0355751
Free cholesterol to total lipids ratio in small VLDL	470	-0.325733	-0.53159	-0.119875	0.0019907		470	-0.0131702	-0.205554	0.179214	0.893042		470	-0.334773	-0.550845	-0.118701	0.0024631
Triglycerides to total lipids ratio in small VLDL	470	0.0739907	-0.118477	0.266458	0.450358		470	0.0677762	-0.140232	0.275784	0.522288		470	0.0391356	-0.157411	0.235683	0.695762
Phospholipids to total lipds ratio in very small VLDL	470	-0.0072724	-0.175875	0.161331	0.932487		470	0.0087508	-0.181322	0.198824	0.92795		470	-0.0269787	-0.194129	0.140172	0.751249
Total cholesterol to total lipids ratio in very small VLDL	470	0.114413	-0.0635135	0.292339	0.206994		470	-0.0645405	-0.255766	0.126685	0.507498		470	0.149999	-0.0308193	0.330817	0.103745
Cholesterol esters to total lipids ratio in very small VLDL	470	0.135463	-0.0353284	0.306254	0.119768		470	-0.0791598	-0.258596	0.100276	0.386425		470	0.187259	0.0097339	0.364784	0.0387395
Free cholesterol to total lipids ratio in very small VLDL	470	-0.0391214	-0.230478	0.152235	0.688048		470	0.0300031	-0.167139	0.227145	0.765016		470	-0.0777838	-0.261771	0.106204	0.406517
Triglycerides to total lipids ratio in very small VLDL	470	-0.0862494	-0.266333	0.0938343	0.347104		470	0.045807	-0.153809	0.245423	0.652236		470	-0.102904	-0.280846	0.0750374	0.25636
Phospholipids to total lipds ratio in IDL	470	0.0643824	-0.104725	0.233489	0.454741		470	0.129496	-0.0503974	0.30939	0.15786		470	-0.0265066	-0.190447	0.137434	0.750831
Total cholesterol to total lipids ratio in IDL	470	0.0457835	-0.128604	0.220171	0.606153		470	-0.0633472	-0.260749	0.134055	0.528599		470	0.0794095	-0.0935225	0.252342	0.367324
Cholesterol esters to total lipids ratio in IDL	470	0.0468441	-0.123131	0.216819	0.58837		470	-0.0931864	-0.288036	0.101663	0.347799		470	0.108647	-0.0646581	0.281952	0.218589
Free cholesterol to total lipids ratio in IDL	470	0.010858	-0.1415	0.163216	0.888683		470	0.0541428	-0.128797	0.237083	0.561118		470	-0.0480057	-0.199026	0.103015	0.532495
Triglycerides to total lipids ratio in IDL	470	-0.0900073	-0.268021	0.0880061	0.320932		470	0.0134435	-0.183656	0.210543	0.893432		470	-0.0858543	-0.266035	0.0943261	0.349571
Phospholipids to total lipds ratio in large LDL	470	0.0109407	-0.153169	0.17505	0.895824		470	0.124057	-0.0604453	0.30856	0.187045		470	-0.069597	-0.224847	0.0856529	0.378801
Total cholesterol to total lipids ratio in large LDL	470	0.0660297	-0.10509	0.23715	0.448669		470	-0.0869513	-0.283867	0.109965	0.385988		470	0.117982	-0.0470625	0.283026	0.160761
Cholesterol esters to total lipids ratio in large LDL	470	0.0468174	-0.126408	0.220043	0.595593		470	-0.117249	-0.316698	0.0822005	0.248594		470	0.124328	-0.0426188	0.291275	0.144021
Free cholesterol to total lipids ratio in large LDL	470	0.0354625	-0.119993	0.190918	0.654156		470	0.138201	-0.0326306	0.309033	0.112572		470	-0.0719275	-0.226502	0.0826471	0.360968
Triglycerides to total lipids ratio in large LDL	470	-0.135122	-0.320112	0.0498683	0.151856		470	0.0195179	-0.184497	0.223533	0.850956		470	-0.139421	-0.331654	0.0528125	0.154761
Phospholipids to total lipds ratio in medium LDL	470	-0.0118098	-0.182314	0.158694	0.891791		470	0.103707	-0.0921393	0.299554	0.298603		470	-0.0749216	-0.234443	0.0846001	0.356512
Total cholesterol to total lipids ratio in medium LDL	470	0.0613669	-0.117804	0.240538	0.501241		470	-0.0925359	-0.298271	0.113199	0.377218		470	0.116148	-0.0544703	0.286766	0.181634
Cholesterol esters to total lipids ratio in medium LDL	470	0.0625408	-0.114622	0.239704	0.488208		470	-0.110032	-0.313828	0.0937645	0.289245		470	0.13285	-0.0343765	0.300075	0.119172
Free cholesterol to total lipids ratio in medium LDL	470	-0.0554984	-0.228367	0.11737	0.528422		470	0.135457	-0.0569058	0.32782	0.16709		470	-0.152672	-0.316534	0.0111893	0.067755
Triglycerides to total lipids ratio in medium LDL	470	-0.141243	-0.329624	0.0471376	0.141324		470	0.046904	-0.164872	0.25868	0.663592		470	-0.165738	-0.360963	0.0294881	0.0959341
Phospholipids to total lipds ratio in small LDL	470	-0.0487746	-0.218111	0.120561	0.57165		470	0.114087	-0.0821026	0.310276	0.253733		470	-0.121973	-0.28109	0.0371437	0.132649
Total cholesterol to total lipids ratio in small LDL	470	0.0700551	-0.104876	0.244986	0.431696		470	-0.093598	-0.295496	0.1083	0.36276		470	0.125566	-0.0411193	0.292251	0.139461
Cholesterol esters to total lipids ratio in small LDL	470	0.0801424	-0.0948832	0.255168	0.368688		470	-0.107498	-0.309689	0.0946918	0.29666		470	0.148412	-0.0175823	0.314406	0.079585
Free cholesterol to total lipids ratio in small LDL	470	-0.0953991	-0.265786	0.0749879	0.271788		470	0.129269	-0.057313	0.315852	0.17402		470	-0.192428	-0.357191	-0.0276646	0.0221776
Triglycerides to total lipids ratio in small LDL	470	-0.101875	-0.290326	0.0865757	0.288638		470	0.0115198	-0.191246	0.214285	0.911152		470	-0.0946009	-0.287203	0.098001	0.334938
Phospholipids to total lipds ratio in very large HDL	470	0.156929	-0.0002093	0.314067	0.0503046		470	0.178306	-0.0304957	0.387107	0.0940013		470	0.0421489	-0.114905	0.199203	0.598176
Total cholesterol to total lipids ratio in very large HDL	470	-0.191044	-0.374959	-0.0071294	0.04179		470	-0.161838	-0.391253	0.0675784	0.166334		470	-0.0918401	-0.272398	0.0887182	0.318048
Cholesterol esters to total lipids ratio in very large HDL	470	-0.178441	-0.367389	0.0105073	0.0641135		470	-0.161432	-0.382905	0.0600406	0.152709		470	-0.076359	-0.264134	0.111416	0.424626
Free cholesterol to total lipids ratio in very large HDL	470	0.0095782	-0.131546	0.150703	0.893955		470	0.0497095	-0.128142	0.227561	0.583095		470	-0.0335741	-0.177316	0.110168	0.646448
Triglycerides to total lipids ratio in very large HDL	470	0.0187026	-0.0434502	0.0808553	0.554586		470	-0.0932418	-0.214258	0.0277743	0.130681		470	0.0890457	0.0005499	0.177541	0.0485991
Phospholipids to total lipds ratio in large HDL	470	-0.0704115	-0.216828	0.0760049	0.345137		470	-0.0164901	-0.196365	0.163384	0.857109		470	-0.0459948	-0.193254	0.101265	0.539657
Total cholesterol to total lipids ratio in large HDL	470	0.0420884	-0.084175	0.168352	0.512759		470	0.0409487	-0.132671	0.214569	0.643236		470	-0.0006051	-0.125401	0.12419	0.992401
Cholesterol esters to total lipids ratio in large HDL	470	0.0666809	-0.0643265	0.197688	0.317726		470	0.0327986	-0.13158	0.197177	0.695159		470	0.0322946	-0.0939647	0.158554	0.615453
Free cholesterol to total lipids ratio in large HDL	470	-0.0125439	-0.132554	0.107466	0.837347		470	0.0521053	-0.138843	0.243054	0.592049		470	-0.0663721	-0.19246	0.0597155	0.30147
Triglycerides to total lipids ratio in large HDL	470	0.0283246	-0.0243604	0.0810097	0.291293		470	-0.0346208	-0.108765	0.0395232	0.359306		470	0.0557964	0.0052607	0.106332	0.0305409
Phospholipids to total lipds ratio in medium HDL	470	-0.024275	-0.191806	0.143256	0.775966		470	-0.119581	-0.309882	0.0707205	0.217516		470	0.0642439	-0.120826	0.249314	0.495476
Total cholesterol to total lipids ratio in medium HDL	470	-0.0787043	-0.243917	0.086508	0.349682		470	0.113137	-0.0822194	0.308494	0.25568		470	-0.17228	-0.342248	-0.0023116	0.0469772
Cholesterol esters to total lipids ratio in medium HDL	470	-0.0349888	-0.204905	0.134927	0.685917		470	0.118041	-0.0739288	0.310011	0.227531		470	-0.13028	-0.306219	0.0456585	0.146307
Free cholesterol to total lipids ratio in medium HDL	470	-0.158031	-0.307768	-0.0082938	0.0386369		470	0.0500878	-0.140993	0.241168	0.606715		470	-0.205741	-0.361771	-0.0497116	0.0098676
Triglycerides to total lipids ratio in medium HDL	470	0.135607	-0.0269128	0.298127	0.101748		470	-0.0898378	-0.285639	0.105964	0.367714		470	0.217005	0.0549632	0.379047	0.0087821
Phospholipids to total lipds ratio in small HDL	470	0.125313	-0.0688201	0.319445	0.205262		470	0.116732	-0.0969057	0.33037	0.283493		470	0.0547813	-0.139597	0.24916	0.579961
Total cholesterol to total lipids ratio in small HDL	470	-0.13196	-0.326276	0.0623557	0.182691		470	-0.076557	-0.286483	0.133369	0.473947		470	-0.0921522	-0.287412	0.103108	0.354182
Cholesterol esters to total lipids ratio in small HDL	470	-0.114862	-0.307587	0.0778627	0.242123		470	-0.0845967	-0.293816	0.124623	0.427259		470	-0.0674614	-0.262053	0.12713	0.496036
Free cholesterol to total lipids ratio in small HDL	470	-0.0729641	-0.251006	0.105078	0.421039		470	0.132001	-0.07501	0.339011	0.210814		470	-0.174446	-0.368328	0.0194367	0.0777015
Triglycerides to total lipids ratio in small HDL	470	0.0895497	-0.0886374	0.267737	0.323867		470	-0.0914869	-0.293699	0.110726	0.374419		470	0.169168	-0.0081425	0.346479	0.0614408
Mean diameter for VLDL particles	470	0.105592	-0.0641453	0.27533	0.222146		470	-0.0290781	-0.227767	0.169611	0.773783		470	0.147307	-0.0259451	0.320558	0.0954311
Mean diameter for LDL particles	470	0.172085	-0.0308818	0.375052	0.0963668		470	0.0365397	-0.168736	0.241816	0.726647		470	0.157458	-0.0465111	0.361426	0.129946
Mean diameter for HDL particles	470	-0.0216452	-0.201558	0.158267	0.813208		470	-0.0111976	-0.223231	0.200836	0.917389		470	-0.0353255	-0.224383	0.153732	0.713646
Serum total cholesterol	470	-0.0627256	-0.245194	0.119743	0.499671		470	-0.142191	-0.338832	0.0544508	0.155998		470	0.0235877	-0.164133	0.211309	0.805075
Total cholesterol in VLDL	470	0.0879427	-0.0748691	0.250754	0.289034		470	-0.15445	-0.345598	0.0366971	0.113004		470	0.207031	0.0458426	0.36822	0.011938
Remnant cholesterol (non-HDL, non-LDL -cholesterol)	470	0.0799823	-0.0902661	0.250231	0.356377		470	-0.167611	-0.361141	0.0259189	0.0894398		470	0.200313	0.0282128	0.372414	0.0226329
Total cholesterol in LDL	470	-0.0029477	-0.189292	0.183397	0.975215		470	-0.145328	-0.349296	0.0586405	0.162137		470	0.0895122	-0.0975885	0.276613	0.347629
Total cholesterol in HDL	470	-0.215529	-0.398365	-0.0326942	0.0209678		470	-0.0102321	-0.210019	0.189555	0.919876		470	-0.230994	-0.420475	-0.0415124	0.0169895
Total cholesterol in HDL2	470	-0.205154	-0.386996	-0.0233118	0.0271073		470	-0.0039927	-0.205004	0.197018	0.96888		470	-0.224814	-0.412641	-0.0369864	0.0190887
Total cholesterol in HDL3	470	-0.271141	-0.467063	-0.0752198	0.0067836		470	-0.0634727	-0.253296	0.126351	0.511443		470	-0.247114	-0.449659	-0.0445693	0.0169031
Esterified cholesterol	470	-0.0554416	-0.237901	0.127018	0.55072		470	-0.144278	-0.34249	0.0539348	0.153277		470	0.0320615	-0.155085	0.219209	0.736524
Free cholesterol	470	-0.0796782	-0.261774	0.102418	0.390308		470	-0.135302	-0.328228	0.0576238	0.168815		470	0.0026332	-0.18621	0.191476	0.978151
Serum total triglycerides	470	0.0325061	-0.126579	0.191591	0.688207		470	-0.11987	-0.307273	0.0675335	0.2094		470	0.129738	-0.0277318	0.287208	0.106119
Triglycerides in VLDL	470	0.0494666	-0.101556	0.200489	0.520108		470	-0.103362	-0.28976	0.0830353	0.276405		470	0.136697	-0.0142386	0.287633	0.0757761
Triglycerides in LDL	470	-0.111618	-0.296092	0.0728572	0.235045		470	-0.146683	-0.338061	0.0446947	0.132702		470	-0.012278	-0.203876	0.17932	0.899842
Triglycerides in HDL	470	0.0253121	-0.173342	0.223966	0.802394		470	-0.0933343	-0.289643	0.102974	0.350627		470	0.0955762	-0.111761	0.302913	0.365476
Total phosphoglycerides	470	-0.164305	-0.345728	0.0171171	0.0757809		470	-0.131348	-0.313514	0.0508185	0.15718		470	-0.0828872	-0.27169	0.105915	0.388735
Ratio of triglycerides to phosphoglycerides	470	-0.0566243	-0.201224	0.0879754	0.441969		470	-0.123826	-0.306147	0.058494	0.182646		470	0.0378576	-0.107294	0.183009	0.608518
Phosphatidylcholine and other cholines	470	-0.125411	-0.311117	0.0602957	0.185137		470	-0.131936	-0.318135	0.054263	0.164458		470	-0.042875	-0.233914	0.148164	0.659392
Total cholines	470	-0.155394	-0.340652	0.0298644	0.0999639		470	-0.11915	-0.303388	0.065089	0.204412		470	-0.0828516	-0.274652	0.108949	0.39639
Apolipoprotein A-I	470	-0.208639	-0.395917	-0.0213608	0.0290787		470	-0.0444223	-0.239984	0.15114	0.655527		470	-0.19836	-0.393292	-0.0034282	0.0461209
Apolipoprotein B	470	0.0528318	-0.114999	0.220663	0.536479		470	-0.161619	-0.354114	0.0308771	0.0996413		470	0.167814	-0.0017207	0.337348	0.052361
Ratio of apolipoprotein B to apolipoprotein A-I	470	0.128812	-0.030294	0.287919	0.112302		470	-0.124897	-0.323514	0.0737202	0.217183		470	0.228836	0.071918	0.385753	0.0043508
Total fatty acids	470	-0.122246	-0.300493	0.0560016	0.178407		470	-0.165146	-0.346968	0.0166762	0.0749362		470	-0.0116554	-0.192751	0.16944	0.899409
Estimated degree of unsaturation	470	-0.0531466	-0.220798	0.114504	0.533616		470	0.0563087	-0.134489	0.247106	0.562225		470	-0.0959773	-0.266825	0.0748703	0.270186
22:6, docosahexaenoic acid	470	-0.251756	-0.43609	-0.0674217	0.0075397		470	-0.0623203	-0.252532	0.127892	0.519992		470	-0.216589	-0.420662	-0.0125154	0.0375609
18:2, linoleic acid	470	-0.156424	-0.334041	0.021193	0.0841831		470	-0.241158	-0.438648	-0.0436671	0.0168082		470	-0.0016703	-0.183529	0.180188	0.985607
Omega-3 fatty acids	470	-0.154932	-0.335054	0.0251897	0.091645		470	-0.0650567	-0.262965	0.132852	0.51861		470	-0.115213	-0.313997	0.0835712	0.255307
Omega-6 fatty acids	470	-0.147668	-0.328741	0.0334047	0.109708		470	-0.201213	-0.39318	-0.0092462	0.0399812		470	-0.0187469	-0.204109	0.166615	0.842547
Polyunsaturated fatty acids	470	-0.151775	-0.332647	0.0290964	0.0998283		470	-0.189666	-0.381343	0.0020109	0.0524421		470	-0.0304808	-0.216875	0.155914	0.748085
Monounsaturated fatty acids; 16:1, 18:1	470	-0.112541	-0.286523	0.0614407	0.204313		470	-0.163431	-0.339781	0.0129188	0.0692293		470	0.0020838	-0.168817	0.172985	0.980894
Saturated fatty acids	470	-0.0874718	-0.267677	0.0927335	0.340645		470	-0.122392	-0.306559	0.0617751	0.192213		470	-0.0049195	-0.187137	0.177298	0.957711
Ratio of 22:6 docosahexaenoic acid to total fatty acids	470	-0.182817	-0.346916	-0.0187173	0.0290785		470	0.0849463	-0.104277	0.27417	0.378132		470	-0.249333	-0.433351	-0.0653151	0.0080253
Ratio of 18:2 linoleic acid to total fatty acids	470	-0.0675117	-0.237046	0.102022	0.43429		470	-0.174884	-0.382878	0.0331105	0.0991537		470	0.0351988	-0.126976	0.197374	0.669929
Ratio of omega-3 fatty acids to total fatty acids	470	-0.0673025	-0.241479	0.106873	0.448038		470	0.107126	-0.101711	0.315963	0.313961		470	-0.146565	-0.341541	0.0484111	0.140303
Ratio of omega-6 fatty acids to total fatty acids	470	-0.0287866	-0.202391	0.144818	0.744683		470	-0.0759192	-0.285968	0.134129	0.477892		470	0.0054865	-0.156945	0.167918	0.947106
Ratio of polyunsaturated fatty acids to total fatty acids	470	-0.0418353	-0.215195	0.131524	0.635561		470	-0.0426884	-0.249547	0.16417	0.685271		470	-0.0298447	-0.193309	0.13362	0.719917
Ratio of monounsaturated fatty acids to total fatty acids	470	-0.0633433	-0.241298	0.114612	0.484596		470	-0.0847777	-0.282176	0.112621	0.399118		470	0.0090161	-0.155008	0.173041	0.914026
Ratio of saturated fatty acids to total fatty acids	470	0.166592	-0.0003306	0.333514	0.0504536		470	0.203044	0.0241266	0.381962	0.0262211		470	0.0297988	-0.139838	0.199436	0.730099
Insulin	470	-0.0278945	-0.240184	0.184394	0.796354		470	-0.0491541	-0.386884	0.288575	0.774996		470	-0.0060467	-0.212263	0.20017	0.954074
Glucose	470	-0.0125278	-0.16728	0.142225	0.873672		470	-0.102328	-0.320167	0.115512	0.356434		470	0.0638888	-0.0694524	0.19723	0.346904
Lactate	470	-0.0071467	-0.176859	0.162566	0.934083		470	-0.172473	-0.350556	0.0056095	0.0576338		470	0.0966863	-0.0830044	0.276377	0.290889
Citrate	470	-0.0351407	-0.225328	0.155047	0.716699		470	0.0209656	-0.17599	0.217922	0.834395		470	-0.0409545	-0.230795	0.148886	0.671804
Alanine	470	0.244064	0.0603286	0.427799	0.0093396		470	0.0177964	-0.186665	0.222258	0.864262		470	0.24438	0.0603883	0.428373	0.0093469
Glutamine	470	-0.050084	-0.205754	0.105586	0.527539		470	-0.132173	-0.303339	0.0389922	0.129834		470	0.0403269	-0.125195	0.205849	0.632324
Histidine	470	0.126391	-0.0515416	0.304324	0.163418		470	0.100359	-0.0950262	0.295744	0.313318		470	0.0582881	-0.122482	0.239058	0.526624
Isoleucine	470	0.122663	-0.0130391	0.258365	0.0763422		470	0.0026492	-0.164944	0.170242	0.975232		470	0.155629	0.0158506	0.295407	0.029174
Leucine	470	0.171191	0.0333701	0.309013	0.0150253		470	0.118594	-0.0469385	0.284126	0.159834		470	0.123152	-0.016822	0.263126	0.0844856
Valine	470	0.208433	0.0407176	0.376149	0.0149728		470	0.162113	-0.0326957	0.356922	0.102666		470	0.128815	-0.0358329	0.293462	0.124868
Phenylalanine	470	0.361375	0.188828	0.533921	4.58e-05		470	0.27533	0.0866678	0.463991	0.0043226		470	0.193149	0.0149947	0.371304	0.0336578
Tyrosine	470	0.22382	0.0502986	0.397342	0.0115829		470	0.096952	-0.104315	0.298219	0.344325		470	0.168174	-0.0187897	0.355139	0.0777835
Acetate	470	-0.0118634	-0.0539384	0.0302116	0.579789		470	-0.0271969	-0.0802703	0.0258765	0.314455		470	0.0025659	-0.0449433	0.050075	0.915523
Acetoacetate	470	-0.194675	-0.356045	-0.0333054	0.0181648		470	-0.0177424	-0.1866	0.151115	0.836503		470	-0.188893	-0.371394	-0.0063917	0.0425292
3-hydroxybutyrate	470	-0.216996	-0.362158	-0.0718345	0.0034739		470	-0.0417093	-0.209825	0.126406	0.6261		470	-0.203163	-0.406627	0.0003007	0.0503381
Creatinine	470	0.114834	-0.0153052	0.244974	0.0835838		470	0.135819	-0.0023112	0.273948	0.0539419		470	0.0641891	-0.0770543	0.205432	0.372283
Albumin (signal area)	470	-0.0460601	-0.211299	0.119178	0.584107		470	-0.0577257	-0.239182	0.123731	0.532175		470	-0.0091344	-0.192	0.173731	0.921846
Glycoprotein acetyls, mainly a1-acid glycoprotein	470	-0.0827452	-0.252435	0.0869446	0.338438		470	-0.140701	-0.326788	0.0453861	0.138004		470	0.0209601	-0.151066	0.192987	0.810872
C-reactive protein	470	-0.126378	-0.397895	0.145139	0.360839		470	-0.101256	-0.440314	0.237802	0.557578		470	-0.0688003	-0.234191	0.0965903	0.414079
